# Supplementary material for: Diverse Hormone Response Networks in 41 Independent Drosophila Cell Lines
Source: PubMed Central journal article supplement (PMC4777130; doi:10.1534/g3.115.023366), 2016-01-12
Supplement: supp_g3.115.023366_023366SI.pdf [file supp_g3.115.023366_023366SI.pdf]

### **List of Supporting Figures**

Figure S1. Transcription Factor Expression Diversity.

Figure S2. Gene Level Clustering and Similarity.

Figure S3. Cell Line Characteristics Clustered by Restricted Ecdysone Response.

Figure S4. Genomic Location of Differentially Expressed Genes.

Figure S5. Raw Responsive Proximal Response.

Figure S6. *Eip75B* Exon Level Ecdysone Response.

Figure S7. *Eip75B* Differential Exon Expression Graphic.

Figure S8. Restricted Response Prediction.

### **List of Supporting Tables**

Table S1. Additional Properties of Cell Lines in this Study

Table S2. SRA Accession numbers for RNA-seq data reported in this study.

Table S3. Raw Gene Counts.

Table S4. Raw Exon Counts.

Table S5. Interactive DE Genes Table.

Table S6. Identified Ecdysone Responsive Genes with Meta-information.

Table S7. Significantly Enriched GO Terms.

Table S8. Robustness of RGC to Thresholds.

Table S9. Most Correlated Genes with RGC.

Table S10. Overlap with Previous Ecdysone Response Studies.

Table S11. Divergently Responsive Genes.

Table S12. Significant Exon Level Responses.

Table S13. Most Correlated Genes with Fraction of *EcR-B1/2* Isoform.

Table S14. Most Important Covariates.

# Supporting Figures

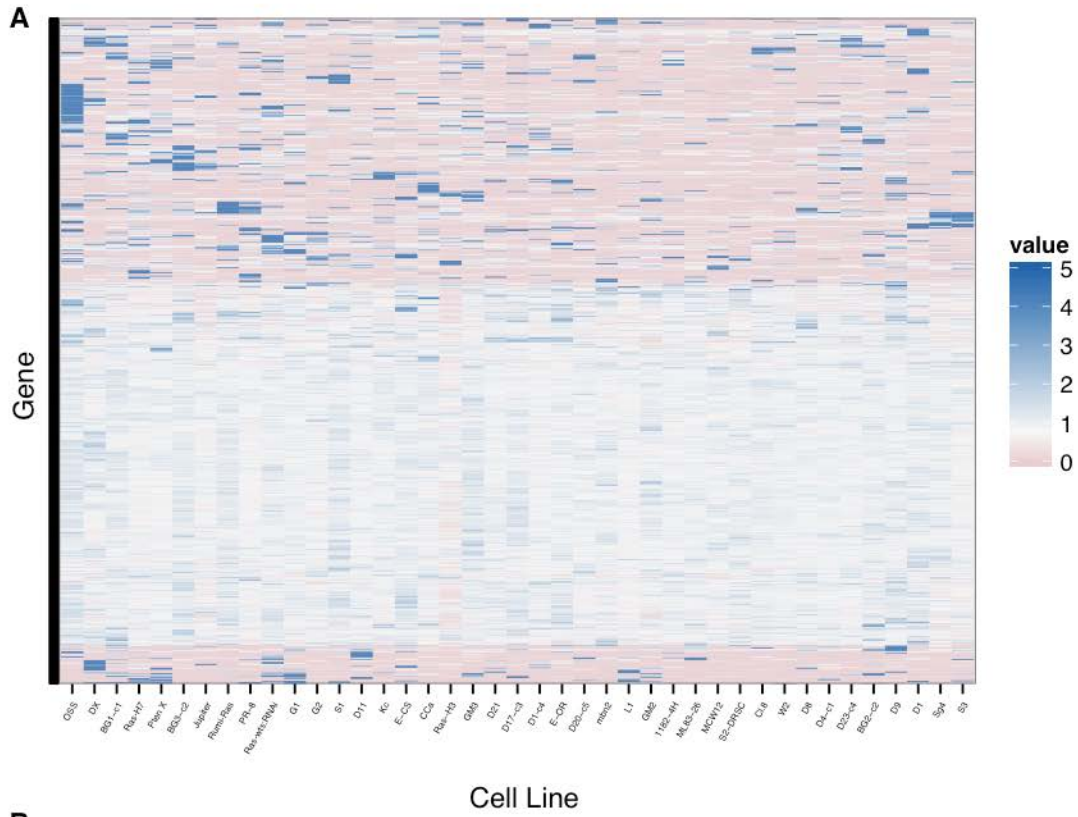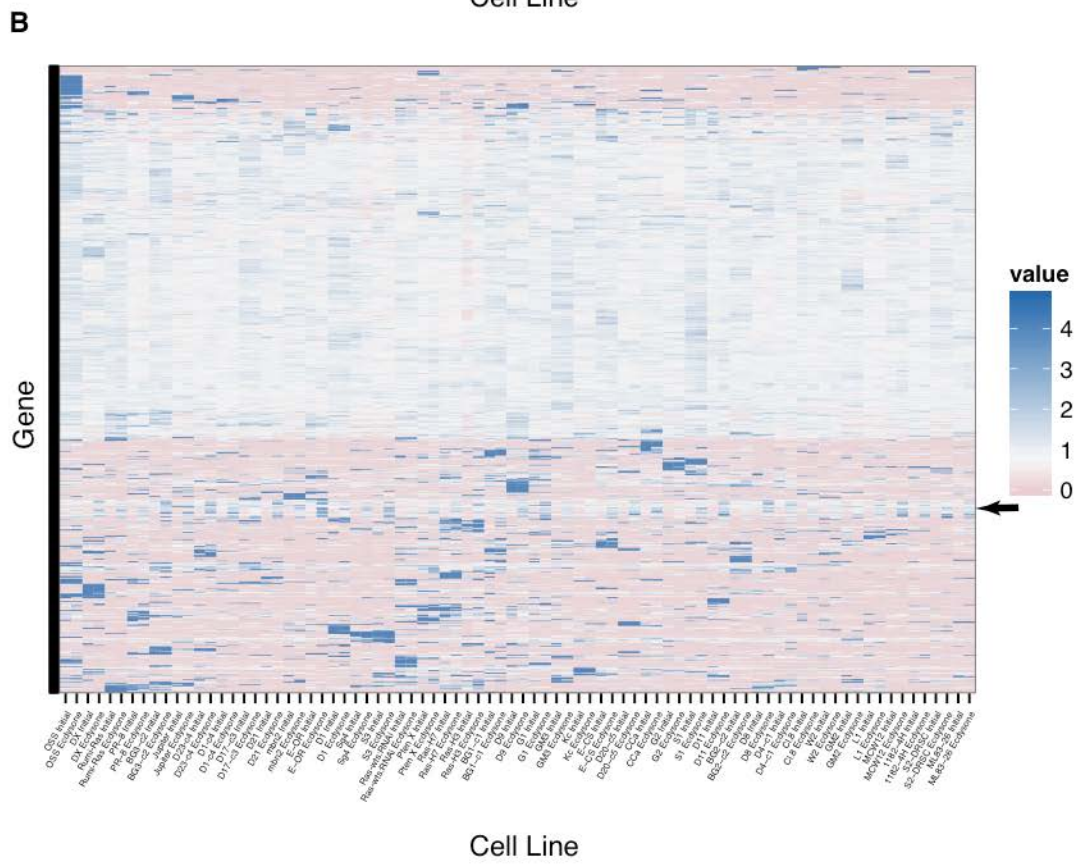

**Figure S1. Transcription Factor Expression Diversity.** This figure is a heat map representing the expression levels of all transcription factors at the A) zero hour time point and B) the zero and five hour exposure time point. The expression levels are normalized by the mean of expression across all cell lines. Both genes and cell lines are hierarchically clustered based on Euclidian distance. The arrow points the cluster of ecdysone responsive genes as noted by the striped pattern of alternative low and high expression.

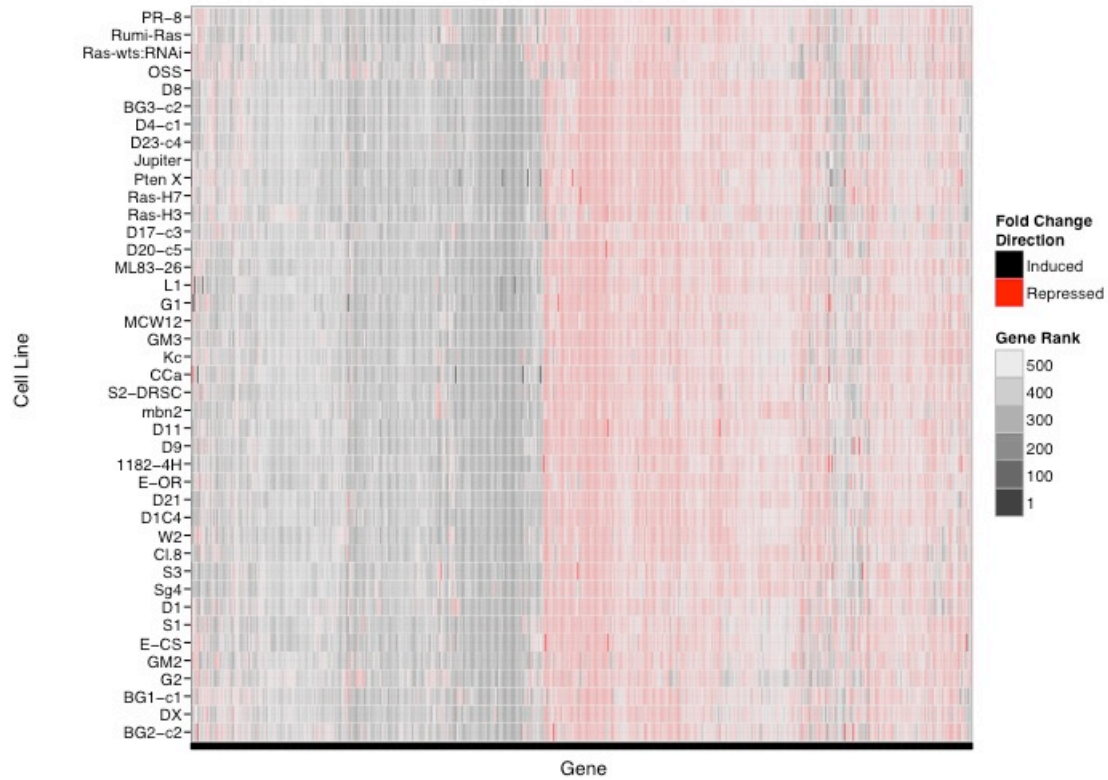

**Figure S2. Gene Level Clustering and Similarity.** This figure is a heat map representing the response of all genes (along the x axis) that respond significantly in at least two cell lines. The color of each cell represents the direction of response (log fold change greater or less than zero) and the level of transparency represents the rank of the log fold change within each cell line. Both cell lines and genes are clustered (using a hierarchical clustering algorithm).

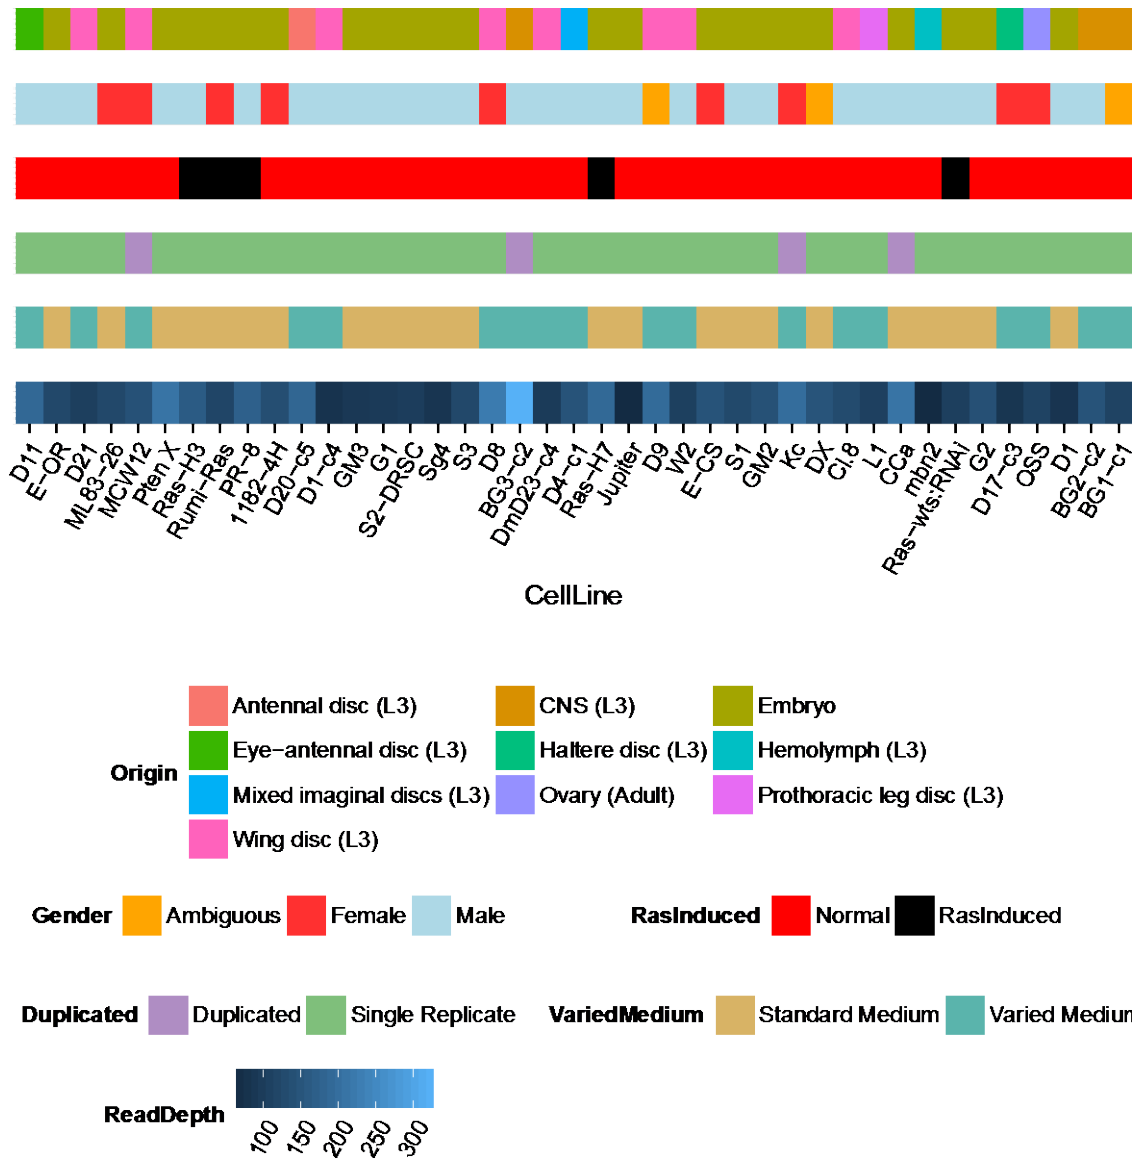

**Figure S3. Cell Line Characteristics Clustered by Restricted Ecdysone Response.** The cell lines in this figure are clustered in the same order as in Figure 1. Shown in the six panels are the tissue of origin, the gender, the inclusion of constitutively active Ras85D, whether the cell line was measured in biological duplicate, whether a standard media was used and the read depth for all samples from each cell line. The clustering of these covariates with the restricted response is discussed in the main text.

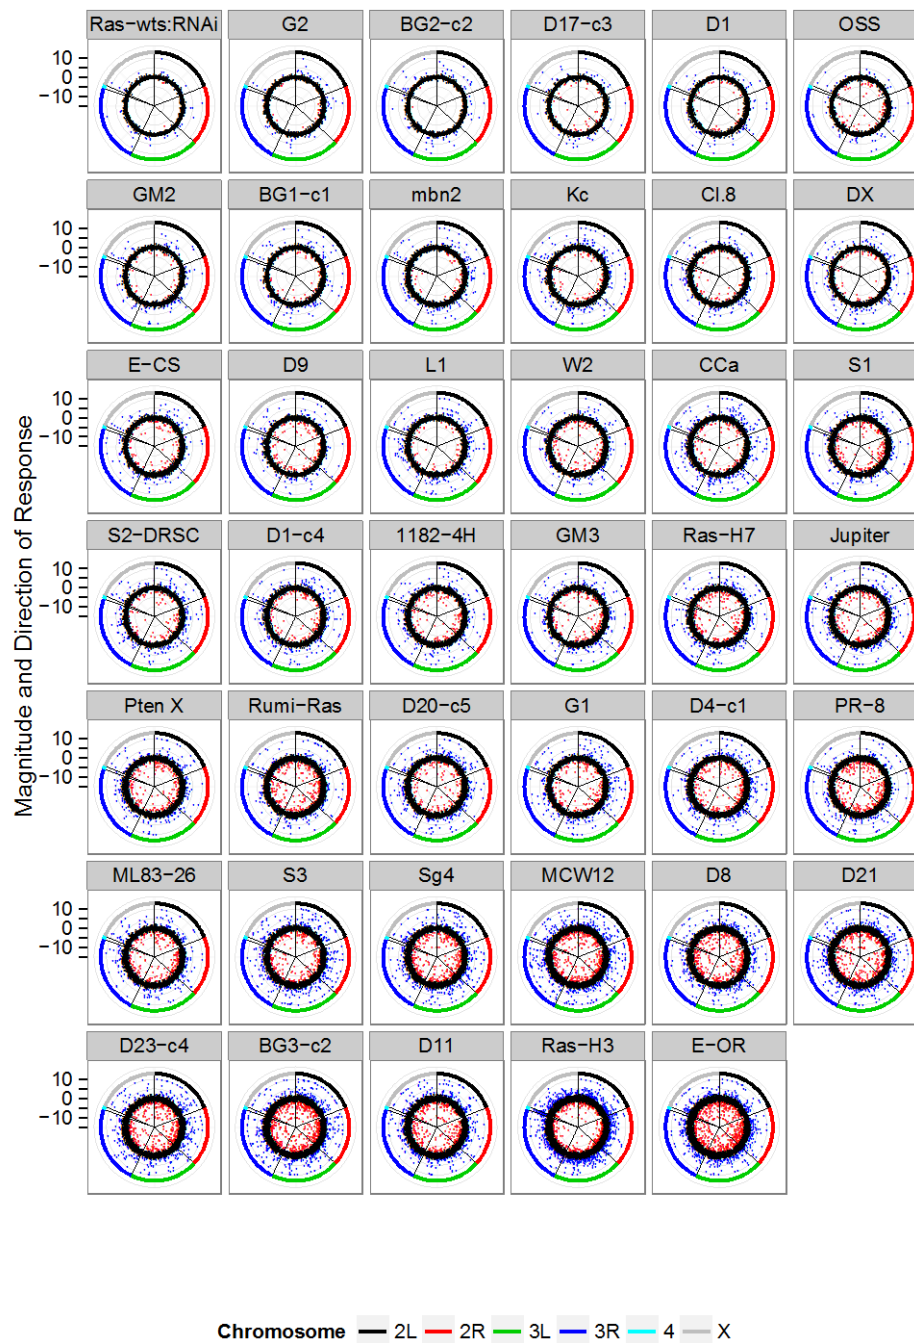

**Figure S4. Genomic Location of Differentially Expressed Genes.** Each panel represents the ecdysone responsive behavior for a cell line (ordered by the total number of responsive genes). The genomic position is represented on the radial axis. The magnitude and direction of response, as measured by the negative log<sub>10</sub> of the differential expression p-value times the direction of response, is represented on the polar axis. Red and blue points are significantly repressed and induced, respectively, in response to ecdysone.

# Up Responsive Genes

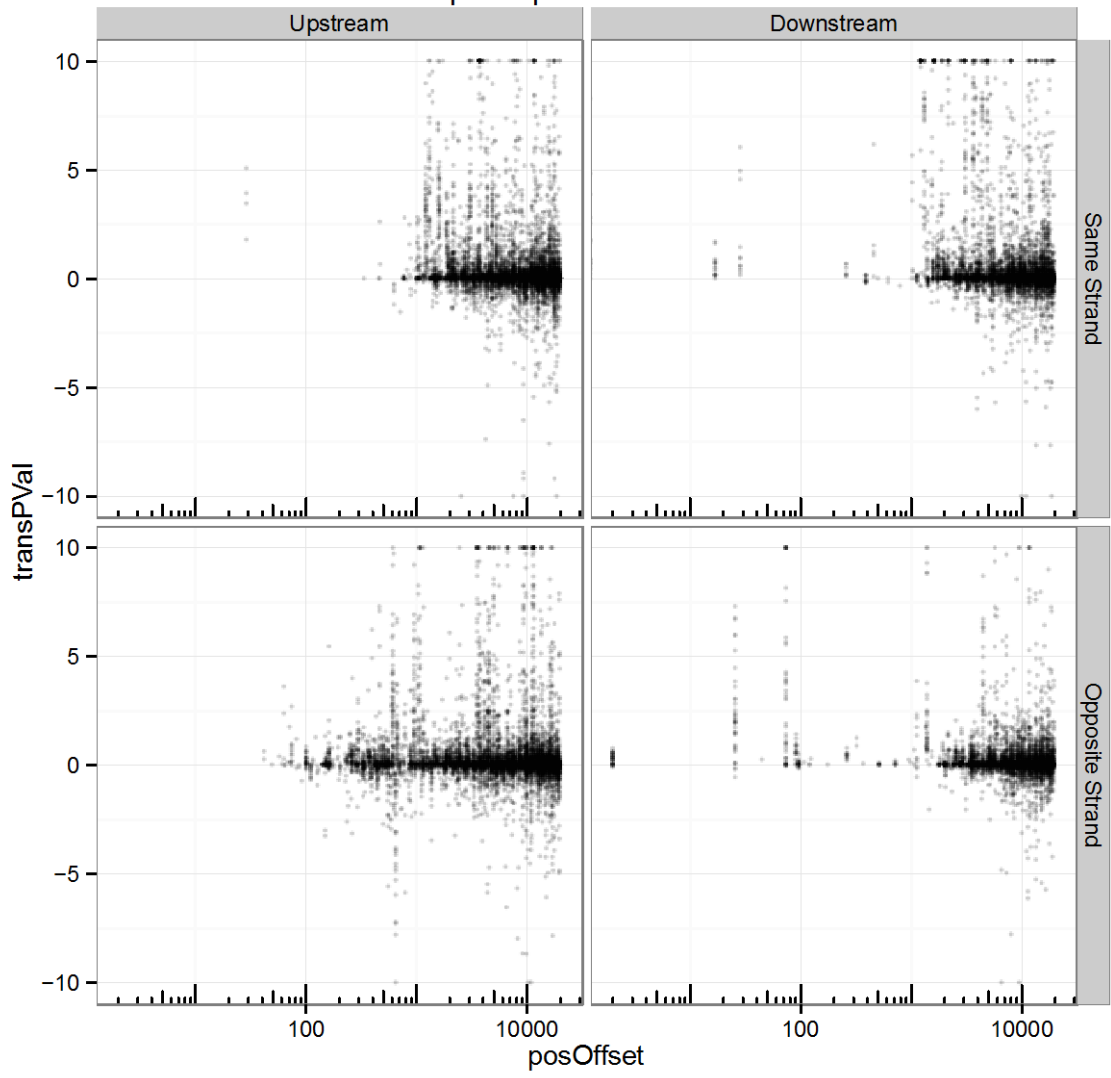



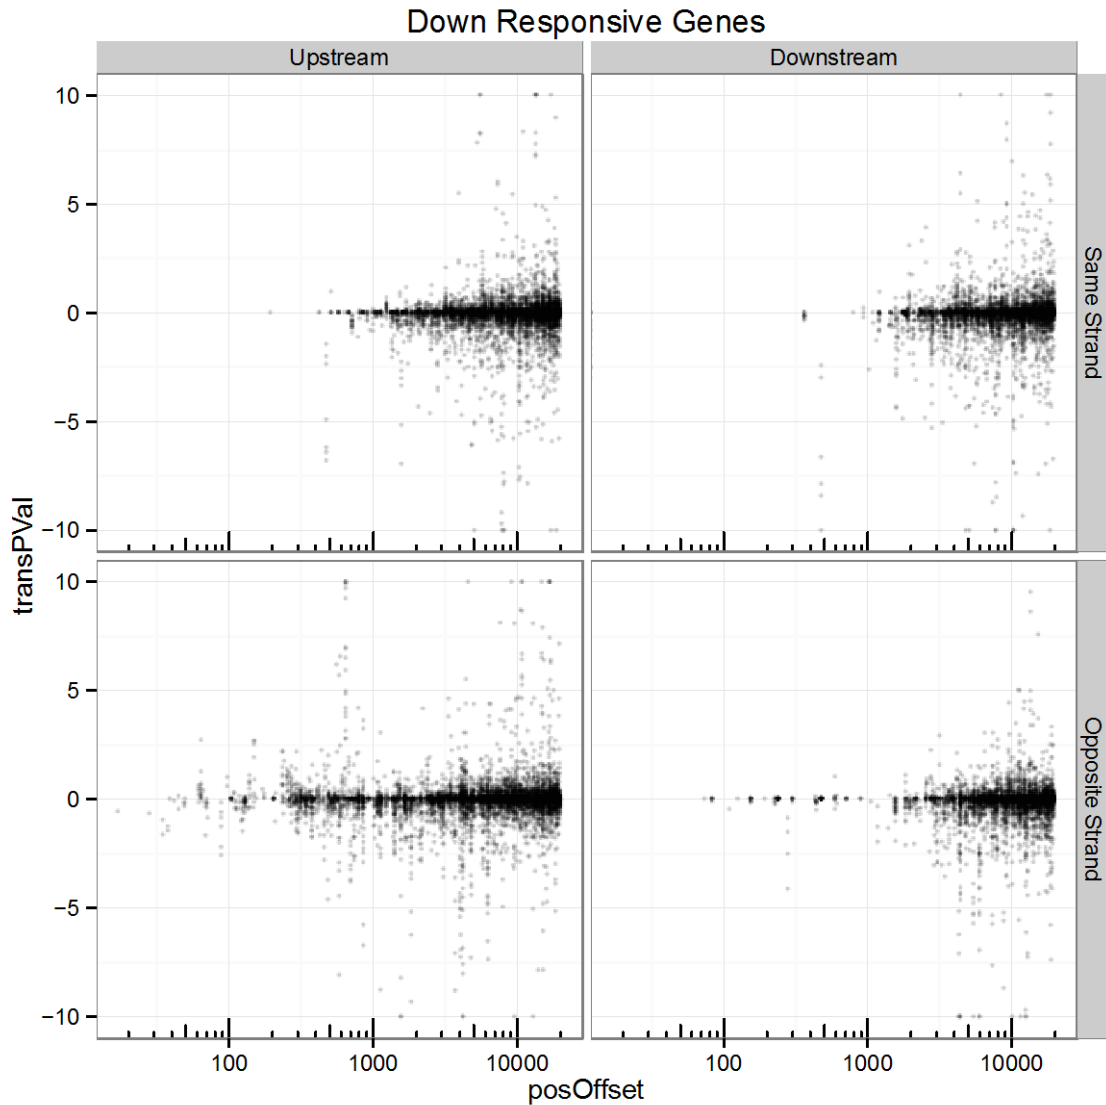

**Figure S5. Raw Responsive Proximal Response.** Each panel of this figure shows the raw points that produced the smoothed lines found in Figure 3. As in figure three each point represents one gene, cell lines combination for a significantly responsive gene and a proximal gene. Different panels show the responsive behavior of genes proximal to responsive genes segregated by the response direction and the promoter architecture (same/opposite strand and up/down stream promoters).

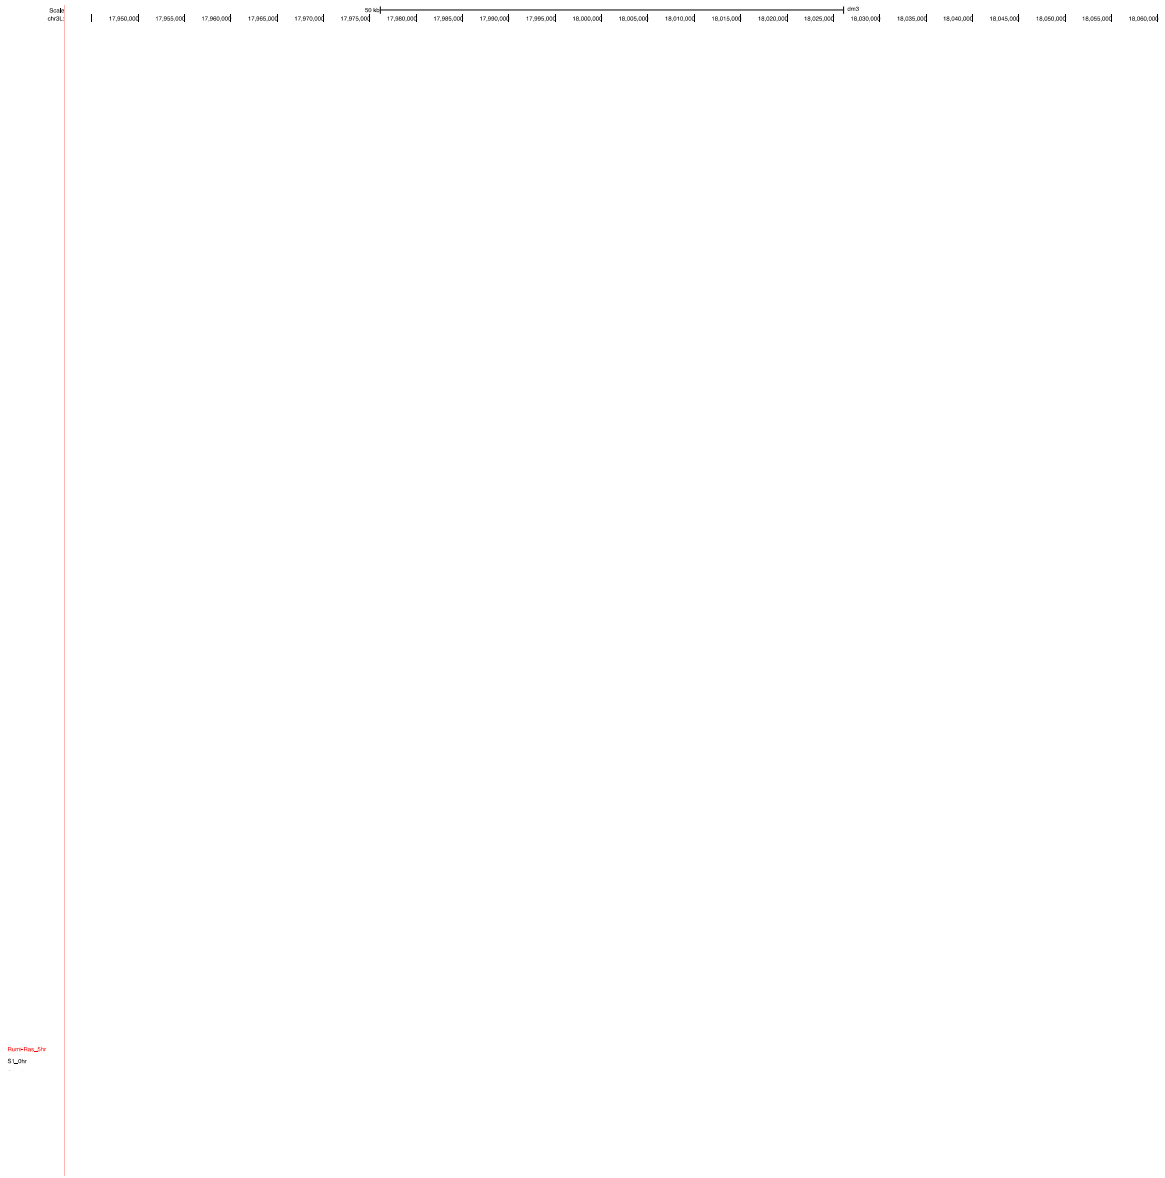

**Figure S6. *Eip75B* Exon Level Ecdysone Response.** This figure shows a genome browser shot of the *Eip75B* locus showing the global promoter switching event across almost all cell lines.



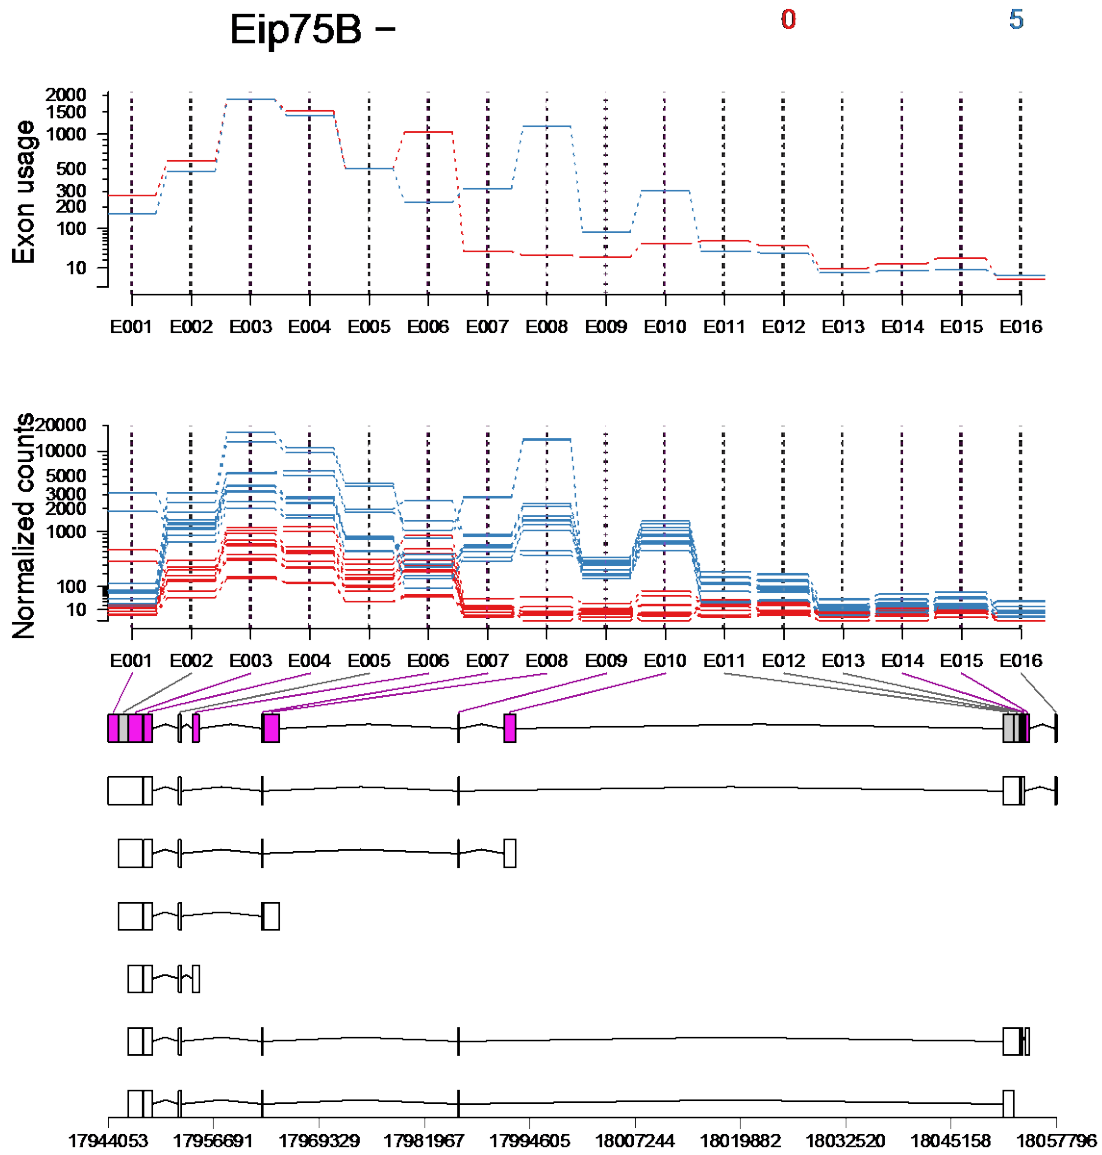

**Figure S7. *Eip75B* Differential Exon Expression Graphic.** This figure shows a graphical representation of the promoter-switching event at the *Eip75B* locus. The top panel shows the average exon usage across all cell lines and the second panel shows the exon usage in each cell line individually. The third panel shows the exons identified as differentially expressed in purple as well as the transcript models present in the FlyBase annotation. This figure was produced using the DEXSeq R package.

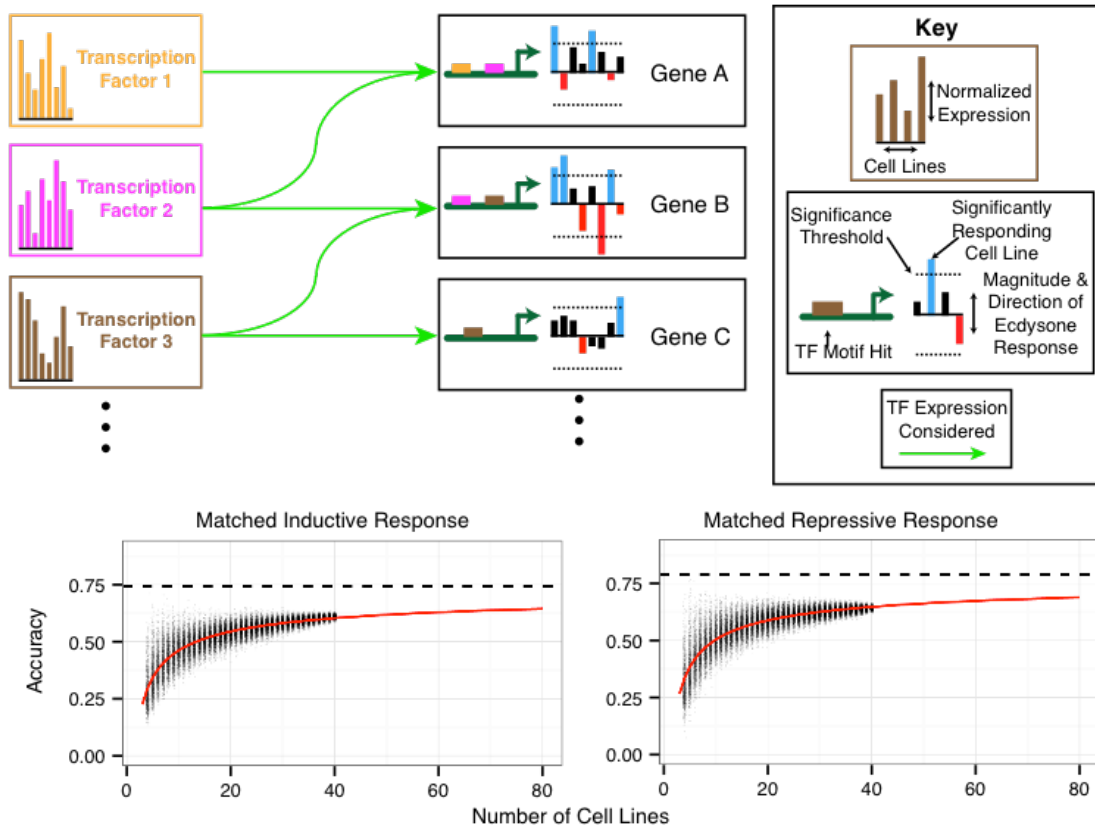

## Supporting Tables

Table S1. Additional Properties of Cell Lines in this Study

| Short name       | Formal name            | Genotype                                                                                                                                      | Additions to medium                  | Sex                                |
|------------------|------------------------|-----------------------------------------------------------------------------------------------------------------------------------------------|--------------------------------------|------------------------------------|
| 1182-4H          | 1182-4H                | <i>mh</i>                                                                                                                                     | --                                   | F(LEE <i>et al.</i> 2014)          |
| CCa              | CCa                    | NA                                                                                                                                            | --                                   | M (data in this study)             |
| L1               | CME L1                 | NA                                                                                                                                            | Insulin, fly extract                 | M (LEE <i>et al.</i> 2014)         |
| Cl.8             | CME W1 Cl.8+           | NA                                                                                                                                            | Insulin, fly extract                 | M (LEE <i>et al.</i> 2014)         |
| W2               | CME W2                 | NA                                                                                                                                            | Insulin, fly extract                 | M (LEE <i>et al.</i> 2014)         |
| D1               | D1                     | NA                                                                                                                                            | --                                   | M (data in this study)             |
| DX               | DX                     | NA                                                                                                                                            | --                                   | Ambiguous (data in this study)     |
| E-CS             | E-CS                   | Wild-type (Canton S)                                                                                                                          | --                                   | F (data in this study)             |
| E-OR             | E-OR                   | Wild-type (Oregon R)                                                                                                                          | --                                   | M (data in this study)             |
| G1               | G1                     | NA                                                                                                                                            | --                                   | M (data in this study)             |
| G2               | G2                     | NA                                                                                                                                            | --                                   | M (data in this study)             |
| GM2              | GM2                    | NA                                                                                                                                            | --                                   | M (data in this study)             |
| GM3              | GM3                    | NA                                                                                                                                            | --                                   | M (data in this study)             |
| Jupiter          | Jupiter                | Jupiter:GFP exon trap                                                                                                                         | --                                   | M (data in this study)             |
| Kc               | Kc167                  | NA                                                                                                                                            | Serum-free medium<br>CCM-3           | F (LEE <i>et al.</i> 2014)         |
| mbn2             | mbn2                   | <i>mbn2<sup>-</sup></i>                                                                                                                       | --                                   | M (LEE <i>et al.</i> 2014)         |
| MCW12            | MCW12                  | NA                                                                                                                                            | Insulin, fly extract                 | F (data in this study)             |
| ML83-26          | ML83-26                | Wild-type (Harwich)                                                                                                                           | --                                   | F (data in this study)             |
| BG1-c1           | ML-DmBG1-c1            | <i>y<sup>1</sup> v<sup>1</sup> f<sup>1</sup> mal<sup>F1</sup></i>                                                                             | Insulin                              | Ambiguous (data in this study)     |
| BG2-c2           | ML-DmBG2-c2            | <i>y<sup>1</sup> v<sup>1</sup> f<sup>1</sup> mal<sup>F1</sup></i>                                                                             | Insulin                              | M (data in this study)             |
| BG3-c2           | ML-DmBG3-c2            | <i>y<sup>1</sup> v<sup>1</sup> f<sup>1</sup> mal<sup>F1</sup></i>                                                                             | Insulin                              | M (LEE <i>et al.</i> 2014)         |
| D1-c4            | ML-DmD1-c4             | <i>y<sup>1</sup> v<sup>1</sup> f<sup>1</sup> mal<sup>F1</sup></i>                                                                             | Insulin                              | M (data in this study)             |
| D11              | ML-DmD11               | <i>y<sup>1</sup> v<sup>1</sup> f<sup>1</sup> mal<sup>F1</sup></i>                                                                             | Insulin                              | M (data in this study)             |
| D17-c3           | ML-DmD17-c3            | <i>y<sup>1</sup> v<sup>1</sup> f<sup>1</sup> mal<sup>F1</sup></i>                                                                             | Insulin                              | F (LEE <i>et al.</i> 2014)         |
| D20-c5           | ML-DmD20-c5            | <i>y<sup>1</sup> v<sup>1</sup> f<sup>1</sup> mal<sup>F1</sup></i>                                                                             | Insulin                              | M (LEE <i>et al.</i> 2014)         |
| D21              | ML-DmD21               | <i>y<sup>1</sup> v<sup>1</sup> f<sup>1</sup> mal<sup>F1</sup></i>                                                                             | Insulin                              | M (data in this study)             |
| D23-c4           | ML-DmD23-c4            | <i>y<sup>1</sup> v<sup>1</sup> f<sup>1</sup> mal<sup>F1</sup></i>                                                                             | Insulin                              | M (data in this study)             |
| D4-c1            | ML-DmD4-c1             | <i>y<sup>1</sup> v<sup>1</sup> f<sup>1</sup> mal<sup>F1</sup></i>                                                                             | Insulin                              | M (LEE <i>et al.</i> 2014)         |
| D8               | ML-DmD8                | <i>y<sup>1</sup> v<sup>1</sup> f<sup>1</sup> mal<sup>F1</sup></i>                                                                             | Insulin                              | F (LEE <i>et al.</i> 2014)         |
| D9               | ML-DmD9                | <i>y<sup>1</sup> v<sup>1</sup> f<sup>1</sup> mal<sup>F1</sup></i>                                                                             | Insulin                              | Ambiguous (LEE <i>et al.</i> 2014) |
| OSS              | OSS                    | <i>w<sup>118</sup>; P [w<sup>+</sup> hsp70-<br/>bam<sup>+</sup>] bam<sup>D86</sup> ry<br/>e/bam<sup>D86</sup> P[ovo-lacZ]<br/>P[vas-egfp]</i> | Insulin, fly extract,<br>glutathione | F (data in this study)             |
| PR-8             | PR8                    | <i>Pten<sup>117</sup>; UAS-GFP;<br/>P{UAS-Ras85D<sup>V12</sup>}/<br/>{Act5C-GAL4}/</i>                                                        | --                                   | M (data in this study)             |
| Pten X           | Pten X                 | <i>Pten<sup>117</sup></i>                                                                                                                     | --                                   | M (data in this study)             |
| Ras-<br>wts:RNAi | Ras[V12];<br>wts[RNAi] | P(LEONARDI <i>et al.</i> )<br>P{UAS-Ras85D <sup>V12</sup> }/<br>P{UAS-GFP P{UAS-<br>wts-RNAi}/ {Act5C-<br>GAL4}}                              | --                                   | M (data in this study)             |
| Ras-H3           | Ras[V12]-H3            | UAS-GFP; P{UAS-<br>Ras85D <sup>V12</sup> }/ {Act5C-<br>GAL4}                                                                                  | --                                   | M (data in this study)             |
| Ras-H7           | Ras[V12]-H7            | UAS-GFP; P{UAS-<br>Ras85D <sup>V12</sup> }/ {Act5C-<br>GAL4}/                                                                                 | --                                   | M (data in this study)             |

|          |                        |                                                                     |    |                            |
|----------|------------------------|---------------------------------------------------------------------|----|----------------------------|
| Rumi-Ras | rumi[26]<br>Ras[V12]-4 | <i>rum<sup>26</sup></i> P{Act5C-GAL4}/P{UAS-Ras85D <sup>V12</sup> } | -- | F (data in this study)     |
| S1       | S1                     | Wild-type (Oregon R)                                                | -- | M (LEE <i>et al.</i> 2014) |
| S2-DRSC  | S2-DRSC                | Wild-type (Oregon R)                                                | -- | M (LEE <i>et al.</i> 2014) |
| S3       | S3                     | Wild-type (Oregon R)                                                | -- | M (LEE <i>et al.</i> 2014) |
| Sg4      | Sg4                    | Wild-type (Oregon R)                                                | -- | M (LEE <i>et al.</i> 2014) |

Listed is additional information for each cell line including genotype, variations to medium and the sex of each cell line along with the associated reference for that determination.

**Table S2. SRA Accession numbers for RNA-seq data reported in this study.**

| Sample         | Treatment | Treatment Time  | SRA Accession # |
|----------------|-----------|-----------------|-----------------|
| D1 C           | control   | ----            | SRR3038122      |
| D1 E           | hormone   | 5 h             | SRR3037437      |
| CME W1 Cl.8+ C | control   | ----            | SRR3038123      |
| CME W1 Cl.8+ E | hormone   | 5 h             | SRR3037943      |
| CME W2 C       | control   | ----            | SRR3038127      |
| CME W2 E       | hormone   | 5 h             | SRR3037521      |
| CME L1 C       | control   | ----            | SRR3038125      |
| CME L1 E       | hormone   | 5 h             | SRR3038124      |
| CCa C1         | control   | ---- (sample 1) | SRR3038213      |
| CCa C2         | control   | ---- (sample 2) | SRR3038131      |
| CCa E1         | hormone   | 5 h (sample 1)  | SRR3038201      |
| CCa E2         | hormone   | 5 h (sample 2)  | SRR3038126      |
| 1182-4H C      | control   | ----            | SRR3038250      |
| 1182-4H E      | hormone   | 5 h             | SRR3038240      |
| DX C           | control   | ----            | SRR3038251      |
| DX E           | hormone   | 5 h             | SRR3038252      |
| E-CS C         | control   | ----            | SRR3038283      |
| E-CS E         | hormone   | 5 h             | SRR3038284      |
| E-OR C         | control   | ----            | SRR3038285      |
| E-OR E         | hormone   | 5 h             | SRR3038290      |
| G1 C           | control   | ----            | SRR3038293      |
| G1 E           | hormone   | 5 h             | SRR3038294      |
| G2 C           | control   | ----            | SRR3038296      |
| G2 E           | hormone   | 5 h             | SRR3038302      |
| GM2 C          | control   | ----            | SRR3038303      |
| GM2 E          | hormone   | 5 h             | SRR3038304      |
| GM3 C          | control   | ----            | SRR3038306      |
| GM3 E          | hormone   | 5 h             | SRR3040020      |
| Jupiter C      | control   | ----            | SRR3040046      |
| Jupiter E      | hormone   | 5 h             | SRR3040053      |
| Kc167 C-1      | control   | ---- (sample 1) | SRR3040054      |
| Kc167 C-2      | control   | ---- (sample 2) | SRR3040509      |
| Kc167 E1-2     | hormone   | 1 h             | SRR3040556      |

|                   |         |                 |            |
|-------------------|---------|-----------------|------------|
| Kc167 E3-2        | hormone | 3 h             | SRR3040557 |
| Kc167 E5-1        | hormone | 5 h (sample 1)  | SRR3040058 |
| Kc167 E5-2        | hormone | 5 h (sample 2)  | SRR3040558 |
| Kc167-E7-2        | hormone | 7 h             | SRR3040559 |
| Kc167 E24-1       | hormone | 24 h            | SRR3040088 |
| mbn2 C            | control | ----            | SRR3040560 |
| mbn2 E            | hormone | 5 h             | SRR3040561 |
| MCW12 C1          | control | ---- (sample 1) | SRR3040562 |
| MCW12 C2          | control | ---- (sample 2) | SRR3040674 |
| MCW12 E1          | hormone | 5 h (sample 1)  | SRR3040594 |
| MCW12 E2          | hormone | 5 h (sample 2)  | SRR3040681 |
| ML83-26 C         | control | ----            | SRR3040682 |
| ML83-26 E         | hormone | 5 h             | SRR3041927 |
| ML-DmBG1-c1 C     | control | ----            | SRR3041928 |
| ML-DmBG1-c1 E     | hormone | 5 h             | SRR3041929 |
| ML-DmBG2-c2 C     | control | ----            | SRR3041930 |
| ML-DmBG2-c2 E     | hormone | 5 h             | SRR3041931 |
| ML-DmBG3-c2 C-1   | control | ---- (sample 1) | SRR3041932 |
| ML-DmBG3-c2 C-2   | control | ---- (sample 2) | SRR3041935 |
| ML-DmBG3-c2 E1-2  | hormone | 1 h             | SRR3041936 |
| ML-DmBG3-c2 E3-2  | hormone | 3 h             | SRR3041937 |
| ML-DmBG3-c2 E5-1  | hormone | 5 h (sample 1)  | SRR3041933 |
| ML-DmBG3-c2 E5-2  | hormone | 5 h (sample 2)  | SRR3041938 |
| ML-DmBG3-c2 E7-2  | hormone | 7 h             | SRR3041939 |
| ML-DmBG3-c2 E24-1 | hormone | 24 h            | SRR3041934 |
| ML-DmD1-c4 C      | control | ----            | SRR3041940 |
| ML-DmD1-c4 E      | hormone | 5 h             | SRR3041941 |
| ML-DmD11 C        | control | ----            | SRR3041942 |
| ML-DmD11 E        | hormone | 5 h             | SRR3041943 |
| ML-DmD17-c3 C     | control | ----            | SRR3041988 |
| ML-DmD17-c3 E     | hormone | 5 h             | SRR3042072 |
| ML-DmD20-c5 C     | control | ----            | SRR3042157 |
| ML-DmD20-c5 E     | hormone | 5 h             | SRR3042198 |
| ML-DmD21 C        | control | ----            | SRR3042199 |
| ML-DmD21 E        | hormone | 5 h             | SRR3042200 |
| ML-DmD23-c4 C     | control | ----            | SRR3042202 |
| ML-DmD23-c4 E     | hormone | 5 h             | SRR3042203 |
| ML-DmD4-c1 C      | control | ----            | SRR3042204 |
| ML-DmD4-c1 E      | hormone | 5 h             | SRR3042538 |
| ML-DmD8 C         | control | ----            | SRR3042539 |
| ML-DmD8 E         | hormone | 5 h             | SRR3042541 |
| ML-DmD9 C         | control | ----            | SRR3042543 |
| ML-DmD9 E         | hormone | 5 h             | SRR3042546 |
| OSS C             | control | ----            | SRR3042549 |
| OSS E             | hormone | 5 h             | SRR3042550 |
| PR8 C             | control | ----            | SRR3042551 |

|                       |         |      |            |
|-----------------------|---------|------|------------|
| PR8 E                 | hormone | 5 h  | SRR3042552 |
| Pten X C              | control | ---- | SRR3042553 |
| Pten X E              | hormone | 5 h  | SRR3042554 |
| Ras[V12]; wts[RNAi] C | control | ---- | SRR3042555 |
| Ras[V12]; wts[RNAi] E | hormone | 5 h  | SRR3042556 |
| Ras[V12]-H3 C         | control | ---- | SRR3042557 |
| Ras[V12]-H3 E         | hormone | 5 h  | SRR3042558 |
| Ras[V12]-H7 C         | control | ---- | SRR3042559 |
| Ras[V12]-H7 E         | hormone | 5 h  | SRR3042560 |
| rumi[26] Ras[V12]-4 C | control | ---- | SRR3042561 |
| rumi[26] Ras[V12]-4 E | hormone | 5 h  | SRR3042562 |
| S1 C                  | control | ---- | SRR3042563 |
| S1 E                  | hormone | 5 h  | SRR3042564 |
| S2-DRSC C             | control | ---- | SRR3042565 |
| S2-DRSC E1            | hormone | 1 h  | SRR3042566 |
| S2-DRSC E3            | hormone | 3 h  | SRR3042567 |
| S2-DRSC E5            | hormone | 5 h  | SRR3042568 |
| S2 DRSC E7            | hormone | 7 h  | SRR3042569 |
| S2-DRSC E24           | hormone | 24 h | SRR3042570 |
| S3 C                  | control | ---- | SRR3042571 |
| S3 E                  | hormone | 5 h  | SRR3042572 |
| Sg4 C                 | control | ---- | SRR3042573 |
| Sg4 E                 | hormone | 5 h  | SRR3042574 |

The SRA accession numbers for each sample reported in this study are presented in this table.

**Table S3. Raw Gene Counts.** The raw gene counts obtained from all RNA-seq mapped reads are found in this table. The counts presented were calculated using the htseq-count function from the ht-seq package (version 0.6.0) using the *Drosophila* annotation version 5.57. This table can be found in additional supporting documents.

**Table S4. Raw Exon Counts.** The raw gene counts obtained from mapped reads are found in this table. This table can be found in additional supporting documents.

**Table S5. Interactive DE Genes Table.** This table shows the p-value and fold change for each gene in each cell line as well as those cell lines interrogated with microarray experiments. The color-coding is dependent upon the editable values in the top left of the spreadsheet (conditional color formatting may not be available for older versions of excel). When these threshold values in these cells are changed all accumulation values as well as charts on the third tab are recalculated.

This table can be found in additional supporting documents. Further descriptions of the interactive functionalities are described on the first tab of the table.

**Table S6. Identified Ecdysone Responsive Genes with Meta-information.** For each gene identified as significantly responsive in a cell line the Fisher's p-value, calculated p-value, adjusted p-value, and log fold change are listed. This table can be found in additional supporting documents.

**Table S7. Significantly Enriched GO Terms.** This table shows the most significantly enriched gene ontology terms within the sets of all and weakly induced/repressed genes. This table can be found in additional supporting documents.

**Table S8. Robustness of RGC to Thresholds.**

|                          |               | Fold Change Threshold  |                        |                        |                      |                        |                      |                      |
|--------------------------|---------------|------------------------|------------------------|------------------------|----------------------|------------------------|----------------------|----------------------|
|                          |               | log <sub>2</sub> (6/5) | log <sub>2</sub> (3/2) | log <sub>2</sub> (5/3) | log <sub>2</sub> (2) | log <sub>2</sub> (5/2) | log <sub>2</sub> (3) | log <sub>2</sub> (4) |
| <b>P-Value Threshold</b> | <b>0.001</b>  | 0.9862                 | 0.9862                 | 0.9862                 | 0.9889               | 0.9938                 | 0.9900               | 0.9714               |
|                          | <b>0.0025</b> | 0.9916                 | 0.9916                 | 0.9916                 | 0.9954               | 0.9954                 | 0.9898               | 0.9684               |
|                          | <b>0.005</b>  | 0.9938                 | 0.9938                 | 0.9938                 | 0.9985               | 0.9955                 | 0.9885               | 0.9665               |
|                          | <b>0.01</b>   | 0.9950                 | 0.9950                 | 0.9960                 | 1.0000               | 0.9949                 | 0.9875               | 0.9659               |
|                          | <b>0.025</b>  | 0.9929                 | 0.9929                 | 0.9966                 | 0.9978               | 0.9922                 | 0.9862               | 0.9633               |
|                          | <b>0.05</b>   | 0.9915                 | 0.9934                 | 0.9960                 | 0.9949               | 0.9890                 | 0.9846               | 0.9633               |
|                          | <b>0.1</b>    | 0.9899                 | 0.9923                 | 0.9913                 | 0.9841               | 0.9834                 | 0.9809               | 0.9629               |

For a range of fold change and p-value thresholds the correlation of the RGC with the RGC calculated using the chosen threshold values are shown. Cell values are the Pearson Correlation between the used thresholds and other thresholds on the number of identified hits.

**Table S9. Most Correlated Genes with RGC.** This table lists the genes that show the largest correlation with the RGC, for which *EcR* shows the strongest correlation, as well as an approximate permutation test p-value. This table can be found in additional supporting documents.



**Table S10. Overlap with Previous Ecdysone Response Studies.**

| Response  | Genes      | Paper                 | Tissue /Cell Line | Early/Late        | Sequencing Tech. | P-Value   | % Hits | # Overlap | # Hits | # Other Hits |
|-----------|------------|-----------------------|-------------------|-------------------|------------------|-----------|--------|-----------|--------|--------------|
| Induced   | All        | Gauhar et al. 2009    | Kc                | Ealry (1, 3,6)    | Microarray       | 6.86E-82  | 9.34   | 87        | 931    | 112          |
| Induced   | All        | Gauhar et al. 2009    | Kc                | Late (12, 24, 48) | Microarray       | 2.64E-62  | 12.03  | 112       | 931    | 267          |
| Induced   | All        | Gonsalves et al. 2011 | Kc                | Ealry (4)         | Microarray       | 1.97E-12  | 2.58   | 24        | 931    | 71           |
| Induced   | All        | Gonsalves et al. 2011 | Salivary          | Ealry (4)         | Microarray       | 1.93E-15  | 3.65   | 34        | 931    | 109          |
| Induced   | All        | Beckstead et al. 2005 | W3 Larvae         | Early (6)         | Microarray       | 2.81E-69  | 16.86  | 157       | 931    | 478          |
| Induced   | All        | Shlyueva et al. 2014  | S2                | Late (24)         | RNA-seq          | 4.33E-107 | 32.22  | 300       | 931    | 1159         |
| Induced   | Widespread | Gauhar et al. 2009    | Kc                | Ealry (1, 3,6)    | Microarray       | 5.04E-44  | 41.18  | 28        | 68     | 112          |
| Induced   | Widespread | Gauhar et al. 2009    | Kc                | Late (12, 24, 48) | Microarray       | 7.24E-34  | 42.65  | 29        | 68     | 267          |
| Induced   | Widespread | Gonsalves et al. 2011 | Kc                | Ealry (4)         | Microarray       | 1.55E-12  | 13.24  | 9         | 68     | 71           |
| Induced   | Widespread | Gonsalves et al. 2011 | Salivary          | Ealry (4)         | Microarray       | 2.88E-09  | 11.76  | 8         | 68     | 109          |
| Induced   | Widespread | Beckstead et al. 2005 | W3 Larvae         | Early (6)         | Microarray       | 1.39E-27  | 44.12  | 30        | 68     | 478          |
| Induced   | Widespread | Shlyueva et al. 2014  | S2                | Late (24)         | RNA-seq          | 5.41E-38  | 70.59  | 48        | 68     | 1159         |
| Induced   | Restricted | Gauhar et al. 2009    | Kc                | Ealry (1, 3,6)    | Microarray       | 1.14E-42  | 6.84   | 59        | 863    | 112          |
| Induced   | Restricted | Gauhar et al. 2009    | Kc                | Late (12, 24, 48) | Microarray       | 3.18E-37  | 9.62   | 83        | 863    | 267          |
| Induced   | Restricted | Gonsalves et al. 2011 | Kc                | Ealry (4)         | Microarray       | 5.94E-06  | 1.74   | 15        | 863    | 71           |
| Induced   | Restricted | Gonsalves et al. 2011 | Salivary          | Ealry (4)         | Microarray       | 4.30E-10  | 3.01   | 26        | 863    | 109          |
| Induced   | Restricted | Beckstead et al. 2005 | W3 Larvae         | Early (6)         | Microarray       | 4.77E-48  | 14.72  | 127       | 863    | 478          |
| Induced   | Restricted | Shlyueva et al. 2014  | S2                | Late (24)         | RNA-seq          | 3.05E-78  | 29.20  | 252       | 863    | 1159         |
| Repressed | All        | Gauhar et al. 2009    | Kc                | Ealry (1, 3,6)    | Microarray       | 4.62E-17  | 3.14   | 25        | 797    | 60           |
| Repressed | All        | Gauhar et al. 2009    | Kc                | Late (12, 24, 48) | Microarray       | 1.43E-15  | 9.66   | 77        | 797    | 510          |
| Repressed | All        | Gonsalves et al. 2011 | Kc                | Ealry (4)         | Microarray       | 3.18E-09  | 2.38   | 19        | 797    | 73           |
| Repressed | All        | Beckstead et al. 2005 | W3 Larvae         | Early (6)         | Microarray       | 0.0002369 | 53     | 14        | 797    | 92           |
| Repressed | All        | Shlyueva et al. 2014  | S2                | Late              | RNA-seq          | 5.86E-57  | 28.86  | 230       | 797    | 1347         |
| Repressed | Widespread | Gauhar et al. 2009    | Kc                | Ealry (1, 3,6)    | Microarray       | 6.35E-11  | 18.75  | 6         | 32     | 60           |
| Repressed | Widespread | Gauhar et al. 2009    | Kc                | Late (12, 24, 48) | Microarray       | 1.58E-06  | 25.00  | 8         | 32     | 510          |
| Repressed | Widespread | Gonsalves et al. 2011 | Kc                | Ealry (4)         | Microarray       | 2.32E-05  | 9.38   | 3         | 32     | 73           |
| Repressed | Widespread | Beckstead et al. 2005 | W3 Larvae         | Early (6)         | Microarray       | 0.0191728 | 58     | 1         | 32     | 92           |
| Repressed | Widespread | Shlyueva et al. 2014  | S2                | Late              | RNA-seq          | 8.26E-10  | 50.00  | 16        | 32     | 1347         |

|           |          |                       |           |                   |            |             |       |     |     |      |
|-----------|----------|-----------------------|-----------|-------------------|------------|-------------|-------|-----|-----|------|
| Repressed | Restrict | Gauhar et al. 2009    | Kc        | Ealry (1, 3,6)    | Microarray | 3.04E-11    | 2.48  | 19  | 765 | 60   |
| Repressed | Restrict | Gauhar et al. 2009    | Kc        | Late (12, 24, 48) | Microarray | 1.32E-12    | 9.02  | 69  | 765 | 510  |
| Repressed | Restrict | Gonsalves et al. 2011 | Kc        | Ealry (4)         | Microarray | 3.52E-07    | 2.09  | 16  | 765 | 73   |
| Repressed | Restrict | Beckstead et al. 2005 | W3 Larvae | Early (6)         | Microarray | 0.000517665 | 1.7   | 13  | 765 | 92   |
| Repressed | Restrict | Shlyueva et al. 2014  | S2 Late   | Late (24)         | RNA-seq    | 2.42E-50    | 27.97 | 214 | 765 | 1347 |

The overlap of widespread, restricted and all responsive genes with previous studies are shown along with the hypergeometric p-value for this overlap.

**Table S11. Divergently Responsive Genes.**

| Gene Name  | Number of Induced Cell Lines | Number of Repressed Cell Lines |
|------------|------------------------------|--------------------------------|
| Oatp74D    | 5                            | 16                             |
| CG9932     | 5                            | 6                              |
| alpha-Est9 | 10                           | 4                              |
| CG13252    | 4                            | 10                             |
| Mal-A5     | 4                            | 3                              |
| sda        | 3                            | 9                              |
| SKIP       | 3                            | 9                              |
| Mct1       | 9                            | 2                              |
| CG32425    | 6                            | 2                              |
| Toll-7     | 4                            | 2                              |
| CG9743     | 2                            | 21                             |
| Argk       | 2                            | 8                              |
| Timp       | 2                            | 7                              |
| CG3036     | 2                            | 6                              |
| bmm        | 2                            | 5                              |
| Pino       | 2                            | 3                              |
| Ama        | 36                           | 1                              |
| CG11509    | 26                           | 1                              |
| CG9416     | 26                           | 1                              |
| br         | 23                           | 1                              |
| eater      | 20                           | 1                              |
| Cyp12a4    | 13                           | 1                              |
| Ugt58Fa    | 7                            | 1                              |
| CG17278    | 4                            | 1                              |
| CrebA      | 4                            | 1                              |
| Apoltp     | 3                            | 1                              |
| bnl        | 3                            | 1                              |
| Cyp9f2     | 2                            | 1                              |
| Dyrk2      | 2                            | 1                              |
| kon        | 2                            | 1                              |
| sick       | 2                            | 1                              |

|             |   |    |
|-------------|---|----|
| Swim        | 2 | 1  |
| Cyp6a13     | 1 | 17 |
| CG31710     | 1 | 14 |
| CG7255      | 1 | 14 |
| GstT4       | 1 | 14 |
| Fas3        | 1 | 13 |
| Ndae1       | 1 | 13 |
| babos       | 1 | 12 |
| yin         | 1 | 11 |
| CG15695     | 1 | 10 |
| CG31522     | 1 | 10 |
| Lrch        | 1 | 10 |
| CG17646     | 1 | 9  |
| rau         | 1 | 9  |
| CG43795     | 1 | 7  |
| Rcd2        | 1 | 7  |
| CG3376      | 1 | 6  |
| lh          | 1 | 6  |
| CG6357      | 1 | 5  |
| CG9521      | 1 | 5  |
| pgant2      | 1 | 5  |
| CG10527     | 1 | 4  |
| CG14995     | 1 | 4  |
| CG18446     | 1 | 4  |
| nrv3        | 1 | 4  |
| ths         | 1 | 4  |
| CG42240     | 1 | 3  |
| Drat        | 1 | 3  |
| Imp         | 1 | 3  |
| tutl        | 1 | 3  |
| CBP         | 1 | 2  |
| CG31219     | 1 | 2  |
| CG9981      | 1 | 2  |
| PH4alphaEFB | 1 | 2  |
| Prestin     | 1 | 2  |
| btl         | 1 | 1  |
| CG13868     | 1 | 1  |
| CG17124     | 1 | 1  |
| CG17150     | 1 | 1  |
| CG17834     | 1 | 1  |
| CG34232     | 1 | 1  |
| CG43164     | 1 | 1  |
| CR44526     | 1 | 1  |
| Cyp6w1      | 1 | 1  |
| E2f         | 1 | 1  |
| ena         | 1 | 1  |
| ldgf3       | 1 | 1  |
| Mbs         | 1 | 1  |

|       |   |   |
|-------|---|---|
| Plod  | 1 | 1 |
| stai  | 1 | 1 |
| sty   | 1 | 1 |
| Traf4 | 1 | 1 |

This table shows the genes that respond significantly inductively in some cell line(s) and significantly repressively in other cell line(s).

**Table S12. Significant Exon Level Responses.** Those exons identified as having significant differential exon usage are shown along with the p-value and fold change associated with the exon usage. This table can be found in additional supporting documents.

**Table S13. Most Correlated Genes with Fraction of *EcR-B1/2* Isoform.**

| Gene       | Correlation with Fraction of Short EcR Isoform | Permutation Test P-Value | Adjusted P-Value |
|------------|------------------------------------------------|--------------------------|------------------|
| glec       | -0.644928268                                   | 0                        | 0                |
| sqz        | 0.660407469                                    | 4.00E-06                 | 0.012388333      |
| CG5059     | 0.59833374                                     | 8.00E-06                 | 0.012388333      |
| Eip55E     | 0.571066986                                    | 8.00E-06                 | 0.012388333      |
| br         | 0.633163455                                    | 1.20E-05                 | 0.012388333      |
| CG5335     | 0.634343237                                    | 1.40E-05                 | 0.012388333      |
| CG14440    | 0.599282244                                    | 1.40E-05                 | 0.012388333      |
| Xbp1       | -0.586784569                                   | 1.50E-05                 | 0.012388333      |
| CG4825     | 0.560477019                                    | 1.50E-05                 | 0.012388333      |
| CG5482     | 0.581179456                                    | 2.00E-05                 | 0.014294231      |
| mlt        | 0.483261053                                    | 2.30E-05                 | 0.014294231      |
| LIMK1      | 0.602181835                                    | 2.50E-05                 | 0.014294231      |
| cdi        | -0.617214213                                   | 2.50E-05                 | 0.014294231      |
| CG34330    | -0.581866181                                   | 3.50E-05                 | 0.0185825        |
| CG5359     | 0.5953757                                      | 4.00E-05                 | 0.019238353      |
| Alh        | 0.577959631                                    | 4.30E-05                 | 0.019238353      |
| loj        | -0.57636296                                    | 4.40E-05                 | 0.019238353      |
| CG2865     | 0.496826963                                    | 5.70E-05                 | 0.022690211      |
| osp        | -0.574710543                                   | 5.80E-05                 | 0.022690211      |
| Tsp42Ee    | -0.598284087                                   | 6.30E-05                 | 0.02341395       |
| CG31370    | 0.576136587                                    | 8.40E-05                 | 0.029219379      |
| CG1418     | -0.550475603                                   | 9.10E-05                 | 0.029219379      |
| tws        | 0.495246729                                    | 9.10E-05                 | 0.029219379      |
| Glycogenin | 0.55734144                                     | 9.90E-05                 | 0.029219379      |
| Syp        | 0.54993558                                     | 0.00011                  | 0.029219379      |
| CG32428    | 0.594831217                                    | 0.000111                 | 0.029219379      |
| CG3408     | 0.551354562                                    | 0.000113                 | 0.029219379      |
| SdhA       | -0.529640291                                   | 0.000114                 | 0.029219379      |
| Klp64D     | -0.528184046                                   | 0.000114                 | 0.029219379      |

|           |              |          |             |
|-----------|--------------|----------|-------------|
| CG2247    | 0.534616716  | 0.000122 | 0.030227533 |
| CG9005    | 0.544531433  | 0.00014  | 0.033568387 |
| cnc       | 0.526806645  | 0.000147 | 0.033885735 |
| Hmg-2     | -0.534014497 | 0.000151 | 0.033885735 |
| Rel       | -0.542420057 | 0.000155 | 0.033885735 |
| CG13624   | 0.556401565  | 0.000174 | 0.036952629 |
| Cbp80     | 0.499257521  | 0.000196 | 0.039575703 |
| CG3587    | 0.539226318  | 0.000197 | 0.039575703 |
| CycE      | 0.53696766   | 0.000206 | 0.040173595 |
| Sans      | -0.478439908 | 0.000218 | 0.040173595 |
| RabX1     | 0.559355235  | 0.000221 | 0.040173595 |
| mnb       | 0.50065999   | 0.000222 | 0.040173595 |
| Pbgs      | -0.51176193  | 0.000227 | 0.040173595 |
| Su(dx)    | -0.497795752 | 0.000251 | 0.043387977 |
| CG9323    | -0.541485883 | 0.000276 | 0.046625182 |
| Itgbetanu | 0.520438966  | 0.000288 | 0.0475712   |
| CG11739   | -0.529675673 | 0.000314 | 0.050133213 |
| CG17036   | 0.504040971  | 0.000317 | 0.050133213 |
| CG9149    | -0.504389999 | 0.00033  | 0.050719294 |
| SCOT      | -0.486500621 | 0.000342 | 0.050719294 |
| ihog      | 0.51369445   | 0.000347 | 0.050719294 |
| CG14971   | -0.520464111 | 0.000348 | 0.050719294 |
| ena       | 0.493287985  | 0.000377 | 0.052534932 |
| tai       | 0.472951129  | 0.000382 | 0.052534932 |
| CG3781    | 0.503481214  | 0.00039  | 0.052534932 |
| CG43658   | 0.467565063  | 0.000397 | 0.052534932 |
| E2f       | 0.502944659  | 0.000404 | 0.052534932 |
| rho       | -0.521886478 | 0.000406 | 0.052534932 |
| CG12560   | 0.494852351  | 0.000415 | 0.052534932 |
| Cog7      | -0.505347582 | 0.000417 | 0.052534932 |
| CG7943    | -0.493436474 | 0.000453 | 0.05611915  |
| CG8858    | 0.473405421  | 0.000497 | 0.060063435 |
| jet       | -0.478195889 | 0.000501 | 0.060063435 |
| CG17029   | 0.474493467  | 0.000554 | 0.063968848 |
| rhea      | 0.496542017  | 0.000562 | 0.063968848 |
| peb       | 0.498685766  | 0.000564 | 0.063968848 |
| qkr58E-1  | 0.476232951  | 0.000568 | 0.063968848 |
| CG15170   | 0.471215173  | 0.000577 | 0.064012552 |
| CG14906   | -0.485501257 | 0.000598 | 0.065366676 |
| CG9743    | -0.51104703  | 0.000611 | 0.065819754 |
| CG7484    | -0.488968967 | 0.000657 | 0.068924182 |
| Lasp      | 0.488775298  | 0.000674 | 0.068924182 |
| Tapdelta  | -0.478834328 | 0.000682 | 0.068924182 |
| CG9590    | -0.472750658 | 0.000691 | 0.068924182 |
| CG6330    | -0.469422457 | 0.000699 | 0.068924182 |
| RnrS      | 0.485264857  | 0.000701 | 0.068924182 |
| CG9705    | 0.49725942   | 0.00071  | 0.068924182 |
| CG7556    | -0.496916291 | 0.000714 | 0.068924182 |

|         |              |          |             |
|---------|--------------|----------|-------------|
| CG3703  | 0.502312479  | 0.000732 | 0.069155127 |
| GlcAT-P | -0.510481353 | 0.000735 | 0.069155127 |
| CG7565  | -0.469127833 | 0.000756 | 0.07024185  |
| Prestin | 0.488607675  | 0.000823 | 0.075522951 |
| CG31777 | -0.485442491 | 0.000883 | 0.079524145 |
| garz    | -0.49225042  | 0.000888 | 0.079524145 |
| CG14907 | -0.476211731 | 0.000922 | 0.081586024 |
| dmGlut  | 0.487515735  | 0.000977 | 0.085435776 |
| mdlc    | 0.485664353  | 0.001023 | 0.088418128 |
| Sec24CD | -0.481288453 | 0.001051 | 0.089794057 |
| CG5001  | -0.477730496 | 0.001098 | 0.092286124 |
| CG32262 | -0.467627802 | 0.001105 | 0.092286124 |
| Mal-B2  | -0.497905227 | 0.00113  | 0.093325444 |
| Cyp28d1 | -0.475526108 | 0.00128  | 0.104552088 |
| CG15111 | -0.468546288 | 0.001313 | 0.106081837 |
| CG7265  | 0.47074843   | 0.001413 | 0.112933645 |
| CG6479  | 0.467233347  | 0.001455 | 0.115053351 |
| Letm1   | -0.472584042 | 0.001494 | 0.116893705 |
| dre4    | 0.476710975  | 0.001587 | 0.122876781 |
| RhoL    | -0.472579311 | 0.001747 | 0.132959684 |
| CG34376 | 0.497281292  | 0.001753 | 0.132959684 |
| bur     | 0.471887383  | 0.001822 | 0.136797232 |
| CG31098 | 0.472187578  | 0.002067 | 0.15364011  |

The genes with normalized expression showing the largest correlation with the fraction of the *ErC-B1/2* isoform are shown in this table.

**Table S14. Most Important Covariates.**

| Gene    | Correlation with Fraction of Short EcR Isoform | Permutation Test P-Value | Adjusted P-Value |
|---------|------------------------------------------------|--------------------------|------------------|
| glec    | -0.644928268                                   | 0                        | 0                |
| sqz     | 0.660407469                                    | 4.00E-06                 | 0.012388333      |
| CG5059  | 0.59833374                                     | 8.00E-06                 | 0.012388333      |
| Eip55E  | 0.571066986                                    | 8.00E-06                 | 0.012388333      |
| br      | 0.633163455                                    | 1.20E-05                 | 0.012388333      |
| CG5335  | 0.634343237                                    | 1.40E-05                 | 0.012388333      |
| CG14440 | 0.599282244                                    | 1.40E-05                 | 0.012388333      |
| Xbp1    | -0.586784569                                   | 1.50E-05                 | 0.012388333      |
| CG4825  | 0.560477019                                    | 1.50E-05                 | 0.012388333      |
| CG5482  | 0.581179456                                    | 2.00E-05                 | 0.014294231      |
| mlt     | 0.483261053                                    | 2.30E-05                 | 0.014294231      |
| LIMK1   | 0.602181835                                    | 2.50E-05                 | 0.014294231      |
| cdi     | -0.617214213                                   | 2.50E-05                 | 0.014294231      |
| CG34330 | -0.581866181                                   | 3.50E-05                 | 0.0185825        |
| CG5359  | 0.5953757                                      | 4.00E-05                 | 0.019238353      |
| Alh     | 0.577959631                                    | 4.30E-05                 | 0.019238353      |

|            |              |          |             |
|------------|--------------|----------|-------------|
| loj        | -0.57636296  | 4.40E-05 | 0.019238353 |
| CG2865     | 0.496826963  | 5.70E-05 | 0.022690211 |
| osp        | -0.574710543 | 5.80E-05 | 0.022690211 |
| Tsp42Ee    | -0.598284087 | 6.30E-05 | 0.02341395  |
| CG31370    | 0.576136587  | 8.40E-05 | 0.029219379 |
| CG1418     | -0.550475603 | 9.10E-05 | 0.029219379 |
| tws        | 0.495246729  | 9.10E-05 | 0.029219379 |
| Glycogenin | 0.55734144   | 9.90E-05 | 0.029219379 |
| Syp        | 0.54993558   | 0.00011  | 0.029219379 |
| CG32428    | 0.594831217  | 0.000111 | 0.029219379 |
| CG3408     | 0.551354562  | 0.000113 | 0.029219379 |
| SdhA       | -0.529640291 | 0.000114 | 0.029219379 |
| Klp64D     | -0.528184046 | 0.000114 | 0.029219379 |
| CG2247     | 0.534616716  | 0.000122 | 0.030227533 |
| CG9005     | 0.544531433  | 0.00014  | 0.033568387 |
| cnc        | 0.526806645  | 0.000147 | 0.033885735 |
| Hmg-2      | -0.534014497 | 0.000151 | 0.033885735 |
| Rel        | -0.542420057 | 0.000155 | 0.033885735 |
| CG13624    | 0.556401565  | 0.000174 | 0.036952629 |
| Cbp80      | 0.499257521  | 0.000196 | 0.039575703 |
| CG3587     | 0.539226318  | 0.000197 | 0.039575703 |
| CycE       | 0.53696766   | 0.000206 | 0.040173595 |
| Sans       | -0.478439908 | 0.000218 | 0.040173595 |
| RabX1      | 0.559355235  | 0.000221 | 0.040173595 |
| mnb        | 0.50065999   | 0.000222 | 0.040173595 |
| Pbgs       | -0.51176193  | 0.000227 | 0.040173595 |
| Su(dx)     | -0.497795752 | 0.000251 | 0.043387977 |
| CG9323     | -0.541485883 | 0.000276 | 0.046625182 |
| Itgbetanu  | 0.520438966  | 0.000288 | 0.0475712   |
| CG11739    | -0.529675673 | 0.000314 | 0.050133213 |
| CG17036    | 0.504040971  | 0.000317 | 0.050133213 |
| CG9149     | -0.504389999 | 0.00033  | 0.050719294 |
| SCOT       | -0.486500621 | 0.000342 | 0.050719294 |
| ihog       | 0.51369445   | 0.000347 | 0.050719294 |
| CG14971    | -0.520464111 | 0.000348 | 0.050719294 |
| ena        | 0.493287985  | 0.000377 | 0.052534932 |
| tai        | 0.472951129  | 0.000382 | 0.052534932 |
| CG3781     | 0.503481214  | 0.00039  | 0.052534932 |
| CG43658    | 0.467565063  | 0.000397 | 0.052534932 |
| E2f        | 0.502944659  | 0.000404 | 0.052534932 |
| rho        | -0.521886478 | 0.000406 | 0.052534932 |
| CG12560    | 0.494852351  | 0.000415 | 0.052534932 |
| Cog7       | -0.505347582 | 0.000417 | 0.052534932 |
| CG7943     | -0.493436474 | 0.000453 | 0.05611915  |
| CG8858     | 0.473405421  | 0.000497 | 0.060063435 |
| jet        | -0.478195889 | 0.000501 | 0.060063435 |
| CG17029    | 0.474493467  | 0.000554 | 0.063968848 |
| rhea       | 0.496542017  | 0.000562 | 0.063968848 |



|          |              |          |             |
|----------|--------------|----------|-------------|
| peb      | 0.498685766  | 0.000564 | 0.063968848 |
| qkr58E-1 | 0.476232951  | 0.000568 | 0.063968848 |
| CG15170  | 0.471215173  | 0.000577 | 0.064012552 |
| CG14906  | -0.485501257 | 0.000598 | 0.065366676 |
| CG9743   | -0.51104703  | 0.000611 | 0.065819754 |
| CG7484   | -0.488968967 | 0.000657 | 0.068924182 |
| Lasp     | 0.488775298  | 0.000674 | 0.068924182 |
| Tapdelta | -0.478834328 | 0.000682 | 0.068924182 |
| CG9590   | -0.472750658 | 0.000691 | 0.068924182 |
| CG6330   | -0.469422457 | 0.000699 | 0.068924182 |
| RnrS     | 0.485264857  | 0.000701 | 0.068924182 |
| CG9705   | 0.49725942   | 0.00071  | 0.068924182 |
| CG7556   | -0.496916291 | 0.000714 | 0.068924182 |
| CG3703   | 0.502312479  | 0.000732 | 0.069155127 |
| GlcAT-P  | -0.510481353 | 0.000735 | 0.069155127 |
| CG7565   | -0.469127833 | 0.000756 | 0.07024185  |
| Prestin  | 0.488607675  | 0.000823 | 0.075522951 |
| CG31777  | -0.485442491 | 0.000883 | 0.079524145 |
| garz     | -0.49225042  | 0.000888 | 0.079524145 |
| CG14907  | -0.476211731 | 0.000922 | 0.081586024 |
| dmGlut   | 0.487515735  | 0.000977 | 0.085435776 |
| mdlc     | 0.485664353  | 0.001023 | 0.088418128 |
| Sec24CD  | -0.481288453 | 0.001051 | 0.089794057 |
| CG5001   | -0.477730496 | 0.001098 | 0.092286124 |
| CG32262  | -0.467627802 | 0.001105 | 0.092286124 |
| Mal-B2   | -0.497905227 | 0.00113  | 0.093325444 |
| Cyp28d1  | -0.475526108 | 0.00128  | 0.104552088 |
| CG15111  | -0.468546288 | 0.001313 | 0.106081837 |
| CG7265   | 0.47074843   | 0.001413 | 0.112933645 |
| CG6479   | 0.467233347  | 0.001455 | 0.115053351 |
| Letm1    | -0.472584042 | 0.001494 | 0.116893705 |
| dre4     | 0.476710975  | 0.001587 | 0.122876781 |
| RhoL     | -0.472579311 | 0.001747 | 0.132959684 |
| CG34376  | 0.497281292  | 0.001753 | 0.132959684 |
| bur      | 0.471887383  | 0.001822 | 0.136797232 |
| CG31098  | 0.472187578  | 0.002067 | 0.15364011  |

This table includes the transcription factor importance values as well as importance values relative to the 20<sup>th</sup> most important variable from the model fitting procedure for the top most important variables.
