# Supplementary material for: Diverse Hormone Response Networks in 41 Independent Drosophila Cell Lines
Source: PubMed Central journal article supplement (PMC4777130; doi:10.1534/g3.115.023366), 2016-01-12
Supplement: supp_g3.115.023366_FigureS1.pdf [file supp_g3.115.023366_FigureS1.pdf]

**Figure S1. Transcription Factor Expression Diversity.** This figure is a heat map representing the expression levels of all transcription factors at the A) zero hour time point and B) the zero and five hour exposure time point. The expression levels are normalized by the mean of expression across all cell lines. Both genes and cell lines are hierarchically clustered based on Euclidian distance. The arrow points the cluster of ecdysone responsive genes as noted by the striped pattern of alternative low and high expression.
