# Supplementary material for: Diverse Hormone Response Networks in 41 Independent Drosophila Cell Lines
Source: PubMed Central journal article supplement (PMC4777130; doi:10.1534/g3.115.023366), 2016-01-12
Supplement: supp_g3.115.023366_TableS1.pdf [file supp_g3.115.023366_TableS1.pdf]

**Table S1. Additional Properties of Cell Lines in this Study**

| Short name       | Formal name            | Genotype                                                                                                                                      | Additions to medium                  | Sex                                |
|------------------|------------------------|-----------------------------------------------------------------------------------------------------------------------------------------------|--------------------------------------|------------------------------------|
| 1182-4H          | 1182-4H                | <i>mh</i>                                                                                                                                     | --                                   | F(LEE <i>et al.</i> 2014)          |
| CCa              | CCa                    | NA                                                                                                                                            | --                                   | M (data in this study)             |
| L1               | CME L1                 | NA                                                                                                                                            | Insulin, fly extract                 | M (LEE <i>et al.</i> 2014)         |
| Cl.8             | CME W1 Cl.8+           | NA                                                                                                                                            | Insulin, fly extract                 | M (LEE <i>et al.</i> 2014)         |
| W2               | CME W2                 | NA                                                                                                                                            | Insulin, fly extract                 | M (LEE <i>et al.</i> 2014)         |
| D1               | D1                     | NA                                                                                                                                            | --                                   | M (data in this study)             |
| DX               | DX                     | NA                                                                                                                                            | --                                   | Ambiguous (data in this study)     |
| E-CS             | E-CS                   | Wild-type (Canton S)                                                                                                                          | --                                   | F (data in this study)             |
| E-OR             | E-OR                   | Wild-type (Oregon R)                                                                                                                          | --                                   | M (data in this study)             |
| G1               | G1                     | NA                                                                                                                                            | --                                   | M (data in this study)             |
| G2               | G2                     | NA                                                                                                                                            | --                                   | M (data in this study)             |
| GM2              | GM2                    | NA                                                                                                                                            | --                                   | M (data in this study)             |
| GM3              | GM3                    | NA                                                                                                                                            | --                                   | M (data in this study)             |
| Jupiter          | Jupiter                | Jupiter:GFP exon trap                                                                                                                         | --                                   | M (data in this study)             |
| Kc               | Kc167                  | NA                                                                                                                                            | Serum-free medium<br>CCM-3           | F (LEE <i>et al.</i> 2014)         |
| mbn2             | mbn2                   | <i>mbn2<sup>-</sup></i>                                                                                                                       | --                                   | M (LEE <i>et al.</i> 2014)         |
| MCW12            | MCW12                  | NA                                                                                                                                            | Insulin, fly extract                 | F (data in this study)             |
| ML83-26          | ML83-26                | Wild-type (Harwich)                                                                                                                           | --                                   | F (data in this study)             |
| BG1-c1           | ML-DmBG1-c1            | <i>y<sup>1</sup> v<sup>1</sup> f<sup>1</sup> mal<sup>F1</sup></i>                                                                             | Insulin                              | Ambiguous (data in this study)     |
| BG2-c2           | ML-DmBG2-c2            | <i>y<sup>1</sup> v<sup>1</sup> f<sup>1</sup> mal<sup>F1</sup></i>                                                                             | Insulin                              | M (data in this study)             |
| BG3-c2           | ML-DmBG3-c2            | <i>y<sup>1</sup> v<sup>1</sup> f<sup>1</sup> mal<sup>F1</sup></i>                                                                             | Insulin                              | M (LEE <i>et al.</i> 2014)         |
| D1-c4            | ML-DmD1-c4             | <i>y<sup>1</sup> v<sup>1</sup> f<sup>1</sup> mal<sup>F1</sup></i>                                                                             | Insulin                              | M (data in this study)             |
| D11              | ML-DmD11               | <i>y<sup>1</sup> v<sup>1</sup> f<sup>1</sup> mal<sup>F1</sup></i>                                                                             | Insulin                              | M (data in this study)             |
| D17-c3           | ML-DmD17-c3            | <i>y<sup>1</sup> v<sup>1</sup> f<sup>1</sup> mal<sup>F1</sup></i>                                                                             | Insulin                              | F (LEE <i>et al.</i> 2014)         |
| D20-c5           | ML-DmD20-c5            | <i>y<sup>1</sup> v<sup>1</sup> f<sup>1</sup> mal<sup>F1</sup></i>                                                                             | Insulin                              | M (LEE <i>et al.</i> 2014)         |
| D21              | ML-DmD21               | <i>y<sup>1</sup> v<sup>1</sup> f<sup>1</sup> mal<sup>F1</sup></i>                                                                             | Insulin                              | M (data in this study)             |
| D23-c4           | ML-DmD23-c4            | <i>y<sup>1</sup> v<sup>1</sup> f<sup>1</sup> mal<sup>F1</sup></i>                                                                             | Insulin                              | M (data in this study)             |
| D4-c1            | ML-DmD4-c1             | <i>y<sup>1</sup> v<sup>1</sup> f<sup>1</sup> mal<sup>F1</sup></i>                                                                             | Insulin                              | M (LEE <i>et al.</i> 2014)         |
| D8               | ML-DmD8                | <i>y<sup>1</sup> v<sup>1</sup> f<sup>1</sup> mal<sup>F1</sup></i>                                                                             | Insulin                              | F (LEE <i>et al.</i> 2014)         |
| D9               | ML-DmD9                | <i>y<sup>1</sup> v<sup>1</sup> f<sup>1</sup> mal<sup>F1</sup></i>                                                                             | Insulin                              | Ambiguous (LEE <i>et al.</i> 2014) |
| OSS              | OSS                    | <i>w<sup>118</sup>; P [w<sup>+</sup> hsp70-<br/>bam<sup>+</sup>] bam<sup>D86</sup> ry<br/>e/bam<sup>D86</sup> P[ovo-lacZ]<br/>P[vas-egfp]</i> | Insulin, fly extract,<br>glutathione | F (data in this study)             |
| PR-8             | PR8                    | <i>Pten<sup>117</sup>; UAS-GFP;<br/>P{UAS-Ras85D<sup>V12</sup>}/<br/>{Act5C-GAL4}/</i>                                                        | --                                   | M (data in this study)             |
| Pten X           | Pten X                 | <i>Pten<sup>117</sup></i>                                                                                                                     | --                                   | M (data in this study)             |
| Ras-<br>wts:RNAi | Ras[V12];<br>wts[RNAi] | P(LEONARDI <i>et al.</i> )<br>P{UAS-Ras85D <sup>V12</sup> }<br>P{UAS-GFP P{UAS-<br>wts-RNAi}/ {Act5C-<br>GAL4}}                               | --                                   | M (data in this study)             |
| Ras-H3           | Ras[V12]-H3            | UAS-GFP; P{UAS-<br>Ras85D <sup>V12</sup> }/ {Act5C-<br>GAL4}                                                                                  | --                                   | M (data in this study)             |
| Ras-H7           | Ras[V12]-H7            | UAS-GFP; P{UAS-<br>Ras85D <sup>V12</sup> }/ {Act5C-<br>GAL4}/                                                                                 | --                                   | M (data in this study)             |

| Rumi-Ras | rumi[26]<br>Ras[V12]-4 | <i>rum<sup>26</sup></i> P{Act5C-<br>GAL4}/P{UAS-<br>Ras85D <sup>V12</sup> } | -- | F (data in this study)     |
|----------|------------------------|-----------------------------------------------------------------------------|----|----------------------------|
| S1       | S1                     | Wild-type (Oregon R)                                                        | -- | M (LEE <i>et al.</i> 2014) |
| S2-DRSC  | S2-DRSC                | Wild-type (Oregon R)                                                        | -- | M (LEE <i>et al.</i> 2014) |
| S3       | S3                     | Wild-type (Oregon R)                                                        | -- | M (LEE <i>et al.</i> 2014) |
| Sg4      | Sg4                    | Wild-type (Oregon R)                                                        | -- | M (LEE <i>et al.</i> 2014) |

Listed is additional information for each cell line including genotype, variations to medium and the sex of each cell line along with the associated reference for that determination.
