# Supplementary material for: Diverse Hormone Response Networks in 41 Independent Drosophila Cell Lines
Source: PubMed Central journal article supplement (PMC4777130; doi:10.1534/g3.115.023366), 2016-01-12
Supplement: supp_g3.115.023366_TableS2.pdf [file supp_g3.115.023366_TableS2.pdf]

**Table S2. SRA Accession numbers for RNA-seq data reported in this study.**

| <b>Sample</b>  | <b>Treatment</b> | <b>Treatment Time</b> | <b>SRA Accession #</b> |
|----------------|------------------|-----------------------|------------------------|
| D1 C           | control          | ----                  | SRR3038122             |
| D1 E           | hormone          | 5 h                   | SRR3037437             |
| CME W1 Cl.8+ C | control          | ----                  | SRR3038123             |
| CME W1 Cl.8+ E | hormone          | 5 h                   | SRR3037943             |
| CME W2 C       | control          | ----                  | SRR3038127             |
| CME W2 E       | hormone          | 5 h                   | SRR3037521             |
| CME L1 C       | control          | ----                  | SRR3038125             |
| CME L1 E       | hormone          | 5 h                   | SRR3038124             |
| CCa C1         | control          | ---- (sample 1)       | SRR3038213             |
| CCa C2         | control          | ---- (sample 2)       | SRR3038131             |
| CCa E1         | hormone          | 5 h (sample 1)        | SRR3038201             |
| CCa E2         | hormone          | 5 h (sample 2)        | SRR3038126             |
| 1182-4H C      | control          | ----                  | SRR3038250             |
| 1182-4H E      | hormone          | 5 h                   | SRR3038240             |
| DX C           | control          | ----                  | SRR3038251             |
| DX E           | hormone          | 5 h                   | SRR3038252             |
| E-CS C         | control          | ----                  | SRR3038283             |
| E-CS E         | hormone          | 5 h                   | SRR3038284             |
| E-OR C         | control          | ----                  | SRR3038285             |
| E-OR E         | hormone          | 5 h                   | SRR3038290             |
| G1 C           | control          | ----                  | SRR3038293             |
| G1 E           | hormone          | 5 h                   | SRR3038294             |
| G2 C           | control          | ----                  | SRR3038296             |
| G2 E           | hormone          | 5 h                   | SRR3038302             |
| GM2 C          | control          | ----                  | SRR3038303             |
| GM2 E          | hormone          | 5 h                   | SRR3038304             |
| GM3 C          | control          | ----                  | SRR3038306             |
| GM3 E          | hormone          | 5 h                   | SRR3040020             |
| Jupiter C      | control          | ----                  | SRR3040046             |
| Jupiter E      | hormone          | 5 h                   | SRR3040053             |
| Kc167 C-1      | control          | ---- (sample 1)       | SRR3040054             |
| Kc167 C-2      | control          | ---- (sample 2)       | SRR3040509             |
| Kc167 E1-2     | hormone          | 1 h                   | SRR3040556             |

|                   |         |                 |            |
|-------------------|---------|-----------------|------------|
| Kc167 E3-2        | hormone | 3 h             | SRR3040557 |
| Kc167 E5-1        | hormone | 5 h (sample 1)  | SRR3040058 |
| Kc167 E5-2        | hormone | 5 h (sample 2)  | SRR3040558 |
| Kc167-E7-2        | hormone | 7 h             | SRR3040559 |
| Kc167 E24-1       | hormone | 24 h            | SRR3040088 |
| mbn2 C            | control | ----            | SRR3040560 |
| mbn2 E            | hormone | 5 h             | SRR3040561 |
| MCW12 C1          | control | ---- (sample 1) | SRR3040562 |
| MCW12 C2          | control | ---- (sample 2) | SRR3040674 |
| MCW12 E1          | hormone | 5 h (sample 1)  | SRR3040594 |
| MCW12 E2          | hormone | 5 h (sample 2)  | SRR3040681 |
| ML83-26 C         | control | ----            | SRR3040682 |
| ML83-26 E         | hormone | 5 h             | SRR3041927 |
| ML-DmBG1-c1 C     | control | ----            | SRR3041928 |
| ML-DmBG1-c1 E     | hormone | 5 h             | SRR3041929 |
| ML-DmBG2-c2 C     | control | ----            | SRR3041930 |
| ML-DmBG2-c2 E     | hormone | 5 h             | SRR3041931 |
| ML-DmBG3-c2 C-1   | control | ---- (sample 1) | SRR3041932 |
| ML-DmBG3-c2 C-2   | control | ---- (sample 2) | SRR3041935 |
| ML-DmBG3-c2 E1-2  | hormone | 1 h             | SRR3041936 |
| ML-DmBG3-c2 E3-2  | hormone | 3 h             | SRR3041937 |
| ML-DmBG3-c2 E5-1  | hormone | 5 h (sample 1)  | SRR3041933 |
| ML-DmBG3-c2 E5-2  | hormone | 5 h (sample 2)  | SRR3041938 |
| ML-DmBG3-c2 E7-2  | hormone | 7 h             | SRR3041939 |
| ML-DmBG3-c2 E24-1 | hormone | 24 h            | SRR3041934 |
| ML-DmD1-c4 C      | control | ----            | SRR3041940 |
| ML-DmD1-c4 E      | hormone | 5 h             | SRR3041941 |
| ML-DmD11 C        | control | ----            | SRR3041942 |
| ML-DmD11 E        | hormone | 5 h             | SRR3041943 |
| ML-DmD17-c3 C     | control | ----            | SRR3041988 |
| ML-DmD17-c3 E     | hormone | 5 h             | SRR3042072 |
| ML-DmD20-c5 C     | control | ----            | SRR3042157 |
| ML-DmD20-c5 E     | hormone | 5 h             | SRR3042198 |
| ML-DmD21 C        | control | ----            | SRR3042199 |
| ML-DmD21 E        | hormone | 5 h             | SRR3042200 |
| ML-DmD23-c4 C     | control | ----            | SRR3042202 |
| ML-DmD23-c4 E     | hormone | 5 h             | SRR3042203 |
| ML-DmD4-c1 C      | control | ----            | SRR3042204 |
| ML-DmD4-c1 E      | hormone | 5 h             | SRR3042538 |
| ML-DmD8 C         | control | ----            | SRR3042539 |
| ML-DmD8 E         | hormone | 5 h             | SRR3042541 |
| ML-DmD9 C         | control | ----            | SRR3042543 |
| ML-DmD9 E         | hormone | 5 h             | SRR3042546 |
| OSS C             | control | ----            | SRR3042549 |
| OSS E             | hormone | 5 h             | SRR3042550 |
| PR8 C             | control | ----            | SRR3042551 |

|                       |         |      |            |
|-----------------------|---------|------|------------|
| PR8 E                 | hormone | 5 h  | SRR3042552 |
| Pten X C              | control | ---- | SRR3042553 |
| Pten X E              | hormone | 5 h  | SRR3042554 |
| Ras[V12]; wts[RNAi] C | control | ---- | SRR3042555 |
| Ras[V12]; wts[RNAi] E | hormone | 5 h  | SRR3042556 |
| Ras[V12]-H3 C         | control | ---- | SRR3042557 |
| Ras[V12]-H3 E         | hormone | 5 h  | SRR3042558 |
| Ras[V12]-H7 C         | control | ---- | SRR3042559 |
| Ras[V12]-H7 E         | hormone | 5 h  | SRR3042560 |
| rumi[26] Ras[V12]-4 C | control | ---- | SRR3042561 |
| rumi[26] Ras[V12]-4 E | hormone | 5 h  | SRR3042562 |
| S1 C                  | control | ---- | SRR3042563 |
| S1 E                  | hormone | 5 h  | SRR3042564 |
| S2-DRSC C             | control | ---- | SRR3042565 |
| S2-DRSC E1            | hormone | 1 h  | SRR3042566 |
| S2-DRSC E3            | hormone | 3 h  | SRR3042567 |
| S2-DRSC E5            | hormone | 5 h  | SRR3042568 |
| S2 DRSC E7            | hormone | 7 h  | SRR3042569 |
| S2-DRSC E24           | hormone | 24 h | SRR3042570 |
| S3 C                  | control | ---- | SRR3042571 |
| S3 E                  | hormone | 5 h  | SRR3042572 |
| Sg4 C                 | control | ---- | SRR3042573 |
| Sg4 E                 | hormone | 5 h  | SRR3042574 |

The SRA accession numbers for each sample reported in this study are presented in this table.
