# Supplementary material for: Diverse Hormone Response Networks in 41 Independent Drosophila Cell Lines
Source: PubMed Central journal article supplement (PMC4777130; doi:10.1534/g3.115.023366), 2016-01-12
Supplement: supp_g3.115.023366_TableS10.pdf [file supp_g3.115.023366_TableS10.pdf]

**Table S10. Overlap with Previous Ecdysone Response Studies.**

| Response  | Genes      | Paper                 | Tissue /Cell Line | Early/Late        | Sequencing Tech. | P-Value   | % Hits | # Overlap | # Hits | # Other Hits |
|-----------|------------|-----------------------|-------------------|-------------------|------------------|-----------|--------|-----------|--------|--------------|
| Induced   | All        | Gauhar et al. 2009    | Kc                | Ealry (1, 3,6)    | Microarray       | 6.86E-82  | 9.34   | 87        | 931    | 112          |
| Induced   | All        | Gauhar et al. 2009    | Kc                | Late (12, 24, 48) | Microarray       | 2.64E-62  | 12.03  | 112       | 931    | 267          |
| Induced   | All        | Gonsalves et al. 2011 | Kc                | Ealry (4)         | Microarray       | 1.97E-12  | 2.58   | 24        | 931    | 71           |
| Induced   | All        | Gonsalves et al. 2011 | Salivary          | Ealry (4)         | Microarray       | 1.93E-15  | 3.65   | 34        | 931    | 109          |
| Induced   | All        | Beckstead et al. 2005 | W3 Larvae         | Early (6)         | Microarray       | 2.81E-69  | 16.86  | 157       | 931    | 478          |
| Induced   | All        | Shlyueva et al. 2014  | S2                | Late (24)         | RNA-seq          | 4.33E-107 | 32.22  | 300       | 931    | 1159         |
| Induced   | Widespread | Gauhar et al. 2009    | Kc                | Ealry (1, 3,6)    | Microarray       | 5.04E-44  | 41.18  | 28        | 68     | 112          |
| Induced   | Widespread | Gauhar et al. 2009    | Kc                | Late (12, 24, 48) | Microarray       | 7.24E-34  | 42.65  | 29        | 68     | 267          |
| Induced   | Widespread | Gonsalves et al. 2011 | Kc                | Ealry (4)         | Microarray       | 1.55E-12  | 13.24  | 9         | 68     | 71           |
| Induced   | Widespread | Gonsalves et al. 2011 | Salivary          | Ealry (4)         | Microarray       | 2.88E-09  | 11.76  | 8         | 68     | 109          |
| Induced   | Widespread | Beckstead et al. 2005 | W3 Larvae         | Early (6)         | Microarray       | 1.39E-27  | 44.12  | 30        | 68     | 478          |
| Induced   | Widespread | Shlyueva et al. 2014  | S2                | Late (24)         | RNA-seq          | 5.41E-38  | 70.59  | 48        | 68     | 1159         |
| Induced   | Restricted | Gauhar et al. 2009    | Kc                | Ealry (1, 3,6)    | Microarray       | 1.14E-42  | 6.84   | 59        | 863    | 112          |
| Induced   | Restricted | Gauhar et al. 2009    | Kc                | Late (12, 24, 48) | Microarray       | 3.18E-37  | 9.62   | 83        | 863    | 267          |
| Induced   | Restricted | Gonsalves et al. 2011 | Kc                | Ealry (4)         | Microarray       | 5.94E-06  | 1.74   | 15        | 863    | 71           |
| Induced   | Restricted | Gonsalves et al. 2011 | Salivary          | Ealry (4)         | Microarray       | 4.30E-10  | 3.01   | 26        | 863    | 109          |
| Induced   | Restricted | Beckstead et al. 2005 | W3 Larvae         | Early (6)         | Microarray       | 4.77E-48  | 14.72  | 127       | 863    | 478          |
| Induced   | Restricted | Shlyueva et al. 2014  | S2                | Late (24)         | RNA-seq          | 3.05E-78  | 29.20  | 252       | 863    | 1159         |
| Repressed | All        | Gauhar et al. 2009    | Kc                | Ealry (1, 3,6)    | Microarray       | 4.62E-17  | 3.14   | 25        | 797    | 60           |
| Repressed | All        | Gauhar et al. 2009    | Kc                | Late (12, 24, 48) | Microarray       | 1.43E-15  | 9.66   | 77        | 797    | 510          |
| Repressed | All        | Gonsalves et al. 2011 | Kc                | Ealry (4)         | Microarray       | 3.18E-09  | 2.38   | 19        | 797    | 73           |
| Repressed | All        | Beckstead et al. 2005 | W3 Larvae         | Early (6)         | Microarray       | 0.0002369 | 53     | 14        | 797    | 92           |
| Repressed | All        | Shlyueva et al. 2014  | S2                | Late              | RNA-seq          | 5.86E-57  | 28.86  | 230       | 797    | 1347         |
| Repressed | Widespread | Gauhar et al. 2009    | Kc                | Ealry (1, 3,6)    | Microarray       | 6.35E-11  | 18.75  | 6         | 32     | 60           |
| Repressed | Widespread | Gauhar et al. 2009    | Kc                | Late (12, 24, 48) | Microarray       | 1.58E-06  | 25.00  | 8         | 32     | 510          |
| Repressed | Widespread | Gonsalves et al. 2011 | Kc                | Ealry (4)         | Microarray       | 2.32E-05  | 9.38   | 3         | 32     | 73           |
| Repressed | Widespread | Beckstead et al. 2005 | W3 Larvae         | Early (6)         | Microarray       | 0.0191728 | 58     | 1         | 32     | 92           |
| Repressed | Widespread | Shlyueva et al. 2014  | S2                | Late              | RNA-seq          | 8.26E-10  | 50.00  | 16        | 32     | 1347         |

|           |            |                       |           |                   |            |             |       |     |     |      |
|-----------|------------|-----------------------|-----------|-------------------|------------|-------------|-------|-----|-----|------|
| Repressed | Restricted | Gauhar et al. 2009    | Kc        | Early (1, 3,6)    | Microarray | 3.04E-11    | 2.48  | 19  | 765 | 60   |
| Repressed | Restricted | Gauhar et al. 2009    | Kc        | Late (12, 24, 48) | Microarray | 1.32E-12    | 9.02  | 69  | 765 | 510  |
| Repressed | Restricted | Gonsalves et al. 2011 | Kc        | Early (4)         | Microarray | 3.52E-07    | 2.09  | 16  | 765 | 73   |
| Repressed | Restricted | Beckstead et al. 2005 | W3 Larvae | Early (6)         | Microarray | 0.000517665 | 1.7   | 13  | 765 | 92   |
| Repressed | Restricted | Shlyueva et al. 2014  | S2 Late   | Late (24)         | RNA-seq    | 2.42E-50    | 27.97 | 214 | 765 | 1347 |

The overlap of widespread, restricted and all responsive genes with previous studies are shown along with the hypergeometric p-value for this overlap.
