# Supplementary material for: Diverse Hormone Response Networks in 41 Independent Drosophila Cell Lines
Source: PubMed Central journal article supplement (PMC4777130; doi:10.1534/g3.115.023366), 2016-01-12
Supplement: supp_g3.115.023366_TableS11.pdf [file supp_g3.115.023366_TableS11.pdf]

**Table S11. Divergently Responsive Genes.**

| Gene Name  | Number of Induced Cell Lines | Number of Repressed Cell Lines |
|------------|------------------------------|--------------------------------|
| Oatp74D    | 5                            | 16                             |
| CG9932     | 5                            | 6                              |
| alpha-Est9 | 10                           | 4                              |
| CG13252    | 4                            | 10                             |
| Mal-A5     | 4                            | 3                              |
| sda        | 3                            | 9                              |
| SKIP       | 3                            | 9                              |
| Mct1       | 9                            | 2                              |
| CG32425    | 6                            | 2                              |
| Toll-7     | 4                            | 2                              |
| CG9743     | 2                            | 21                             |
| Argk       | 2                            | 8                              |
| Timp       | 2                            | 7                              |
| CG3036     | 2                            | 6                              |
| bmm        | 2                            | 5                              |
| Pino       | 2                            | 3                              |
| Ama        | 36                           | 1                              |
| CG11509    | 26                           | 1                              |
| CG9416     | 26                           | 1                              |
| br         | 23                           | 1                              |
| eater      | 20                           | 1                              |
| Cyp12a4    | 13                           | 1                              |
| Ugt58Fa    | 7                            | 1                              |
| CG17278    | 4                            | 1                              |
| CrebA      | 4                            | 1                              |
| Apoltp     | 3                            | 1                              |
| bnl        | 3                            | 1                              |
| Cyp9f2     | 2                            | 1                              |
| Dyrk2      | 2                            | 1                              |
| kon        | 2                            | 1                              |
| sick       | 2                            | 1                              |

|             |   |    |
|-------------|---|----|
| Swim        | 2 | 1  |
| Cyp6a13     | 1 | 17 |
| CG31710     | 1 | 14 |
| CG7255      | 1 | 14 |
| GstT4       | 1 | 14 |
| Fas3        | 1 | 13 |
| Ndae1       | 1 | 13 |
| babos       | 1 | 12 |
| yin         | 1 | 11 |
| CG15695     | 1 | 10 |
| CG31522     | 1 | 10 |
| Lrch        | 1 | 10 |
| CG17646     | 1 | 9  |
| rau         | 1 | 9  |
| CG43795     | 1 | 7  |
| Rcd2        | 1 | 7  |
| CG3376      | 1 | 6  |
| lh          | 1 | 6  |
| CG6357      | 1 | 5  |
| CG9521      | 1 | 5  |
| pgant2      | 1 | 5  |
| CG10527     | 1 | 4  |
| CG14995     | 1 | 4  |
| CG18446     | 1 | 4  |
| nrv3        | 1 | 4  |
| ths         | 1 | 4  |
| CG42240     | 1 | 3  |
| Drat        | 1 | 3  |
| Imp         | 1 | 3  |
| tutl        | 1 | 3  |
| CBP         | 1 | 2  |
| CG31219     | 1 | 2  |
| CG9981      | 1 | 2  |
| PH4alphaEFB | 1 | 2  |
| Prestin     | 1 | 2  |
| btl         | 1 | 1  |
| CG13868     | 1 | 1  |
| CG17124     | 1 | 1  |
| CG17150     | 1 | 1  |
| CG17834     | 1 | 1  |
| CG34232     | 1 | 1  |
| CG43164     | 1 | 1  |
| CR44526     | 1 | 1  |
| Cyp6w1      | 1 | 1  |
| E2f         | 1 | 1  |
| ena         | 1 | 1  |
| ldgf3       | 1 | 1  |
| Mbs         | 1 | 1  |

|       |   |   |
|-------|---|---|
| Plod  | 1 | 1 |
| stai  | 1 | 1 |
| sty   | 1 | 1 |
| Traf4 | 1 | 1 |

This table shows the genes that respond significantly inductively in some cell line(s) and significantly repressively in other cell line(s).
