# Supplementary material for: Diverse Hormone Response Networks in 41 Independent Drosophila Cell Lines
Source: PubMed Central journal article supplement (PMC4777130; doi:10.1534/g3.115.023366), 2016-01-12
Supplement: supp_g3.115.023366_TableS14.pdf [file supp_g3.115.023366_TableS14.pdf]

**Table S14. Most Important Covariates.**

| <b>Gene</b> | <b>Correlation with Fraction of Short EcR Isoform</b> | <b>Permutation Test P-Value</b> | <b>Adjusted P-Value</b> |
|-------------|-------------------------------------------------------|---------------------------------|-------------------------|
| glec        | -0.644928268                                          | 0                               | 0                       |
| sqz         | 0.660407469                                           | 4.00E-06                        | 0.012388333             |
| CG5059      | 0.59833374                                            | 8.00E-06                        | 0.012388333             |
| Eip55E      | 0.571066986                                           | 8.00E-06                        | 0.012388333             |
| br          | 0.633163455                                           | 1.20E-05                        | 0.012388333             |
| CG5335      | 0.634343237                                           | 1.40E-05                        | 0.012388333             |
| CG14440     | 0.599282244                                           | 1.40E-05                        | 0.012388333             |
| Xbp1        | -0.586784569                                          | 1.50E-05                        | 0.012388333             |
| CG4825      | 0.560477019                                           | 1.50E-05                        | 0.012388333             |
| CG5482      | 0.581179456                                           | 2.00E-05                        | 0.014294231             |
| mlt         | 0.483261053                                           | 2.30E-05                        | 0.014294231             |
| LIMK1       | 0.602181835                                           | 2.50E-05                        | 0.014294231             |
| cdi         | -0.617214213                                          | 2.50E-05                        | 0.014294231             |
| CG34330     | -0.581866181                                          | 3.50E-05                        | 0.0185825               |
| CG5359      | 0.5953757                                             | 4.00E-05                        | 0.019238353             |
| Alh         | 0.577959631                                           | 4.30E-05                        | 0.019238353             |

|            |              |          |             |
|------------|--------------|----------|-------------|
| loj        | -0.57636296  | 4.40E-05 | 0.019238353 |
| CG2865     | 0.496826963  | 5.70E-05 | 0.022690211 |
| osp        | -0.574710543 | 5.80E-05 | 0.022690211 |
| Tsp42Ee    | -0.598284087 | 6.30E-05 | 0.02341395  |
| CG31370    | 0.576136587  | 8.40E-05 | 0.029219379 |
| CG1418     | -0.550475603 | 9.10E-05 | 0.029219379 |
| tws        | 0.495246729  | 9.10E-05 | 0.029219379 |
| Glycogenin | 0.55734144   | 9.90E-05 | 0.029219379 |
| Syp        | 0.54993558   | 0.00011  | 0.029219379 |
| CG32428    | 0.594831217  | 0.000111 | 0.029219379 |
| CG3408     | 0.551354562  | 0.000113 | 0.029219379 |
| SdhA       | -0.529640291 | 0.000114 | 0.029219379 |
| Klp64D     | -0.528184046 | 0.000114 | 0.029219379 |
| CG2247     | 0.534616716  | 0.000122 | 0.030227533 |
| CG9005     | 0.544531433  | 0.00014  | 0.033568387 |
| cnc        | 0.526806645  | 0.000147 | 0.033885735 |
| Hmg-2      | -0.534014497 | 0.000151 | 0.033885735 |
| Rel        | -0.542420057 | 0.000155 | 0.033885735 |
| CG13624    | 0.556401565  | 0.000174 | 0.036952629 |
| Cbp80      | 0.499257521  | 0.000196 | 0.039575703 |
| CG3587     | 0.539226318  | 0.000197 | 0.039575703 |
| CycE       | 0.53696766   | 0.000206 | 0.040173595 |
| Sans       | -0.478439908 | 0.000218 | 0.040173595 |
| RabX1      | 0.559355235  | 0.000221 | 0.040173595 |
| mnb        | 0.50065999   | 0.000222 | 0.040173595 |
| Pbgs       | -0.51176193  | 0.000227 | 0.040173595 |
| Su(dx)     | -0.497795752 | 0.000251 | 0.043387977 |
| CG9323     | -0.541485883 | 0.000276 | 0.046625182 |
| Itgbetanu  | 0.520438966  | 0.000288 | 0.0475712   |
| CG11739    | -0.529675673 | 0.000314 | 0.050133213 |
| CG17036    | 0.504040971  | 0.000317 | 0.050133213 |
| CG9149     | -0.504389999 | 0.00033  | 0.050719294 |
| SCOT       | -0.486500621 | 0.000342 | 0.050719294 |
| ihog       | 0.51369445   | 0.000347 | 0.050719294 |
| CG14971    | -0.520464111 | 0.000348 | 0.050719294 |
| ena        | 0.493287985  | 0.000377 | 0.052534932 |
| tai        | 0.472951129  | 0.000382 | 0.052534932 |
| CG3781     | 0.503481214  | 0.00039  | 0.052534932 |
| CG43658    | 0.467565063  | 0.000397 | 0.052534932 |
| E2f        | 0.502944659  | 0.000404 | 0.052534932 |
| rho        | -0.521886478 | 0.000406 | 0.052534932 |
| CG12560    | 0.494852351  | 0.000415 | 0.052534932 |
| Cog7       | -0.505347582 | 0.000417 | 0.052534932 |
| CG7943     | -0.493436474 | 0.000453 | 0.05611915  |
| CG8858     | 0.473405421  | 0.000497 | 0.060063435 |
| jet        | -0.478195889 | 0.000501 | 0.060063435 |
| CG17029    | 0.474493467  | 0.000554 | 0.063968848 |
| rhea       | 0.496542017  | 0.000562 | 0.063968848 |

|          |              |          |             |
|----------|--------------|----------|-------------|
| peb      | 0.498685766  | 0.000564 | 0.063968848 |
| qkr58E-1 | 0.476232951  | 0.000568 | 0.063968848 |
| CG15170  | 0.471215173  | 0.000577 | 0.064012552 |
| CG14906  | -0.485501257 | 0.000598 | 0.065366676 |
| CG9743   | -0.51104703  | 0.000611 | 0.065819754 |
| CG7484   | -0.488968967 | 0.000657 | 0.068924182 |
| Lasp     | 0.488775298  | 0.000674 | 0.068924182 |
| Tapdelta | -0.478834328 | 0.000682 | 0.068924182 |
| CG9590   | -0.472750658 | 0.000691 | 0.068924182 |
| CG6330   | -0.469422457 | 0.000699 | 0.068924182 |
| RnrS     | 0.485264857  | 0.000701 | 0.068924182 |
| CG9705   | 0.49725942   | 0.00071  | 0.068924182 |
| CG7556   | -0.496916291 | 0.000714 | 0.068924182 |
| CG3703   | 0.502312479  | 0.000732 | 0.069155127 |
| GlcAT-P  | -0.510481353 | 0.000735 | 0.069155127 |
| CG7565   | -0.469127833 | 0.000756 | 0.07024185  |
| Prestin  | 0.488607675  | 0.000823 | 0.075522951 |
| CG31777  | -0.485442491 | 0.000883 | 0.079524145 |
| garz     | -0.49225042  | 0.000888 | 0.079524145 |
| CG14907  | -0.476211731 | 0.000922 | 0.081586024 |
| dmGlut   | 0.487515735  | 0.000977 | 0.085435776 |
| mdlc     | 0.485664353  | 0.001023 | 0.088418128 |
| Sec24CD  | -0.481288453 | 0.001051 | 0.089794057 |
| CG5001   | -0.477730496 | 0.001098 | 0.092286124 |
| CG32262  | -0.467627802 | 0.001105 | 0.092286124 |
| Mal-B2   | -0.497905227 | 0.00113  | 0.093325444 |
| Cyp28d1  | -0.475526108 | 0.00128  | 0.104552088 |
| CG15111  | -0.468546288 | 0.001313 | 0.106081837 |
| CG7265   | 0.47074843   | 0.001413 | 0.112933645 |
| CG6479   | 0.467233347  | 0.001455 | 0.115053351 |
| Letm1    | -0.472584042 | 0.001494 | 0.116893705 |
| dre4     | 0.476710975  | 0.001587 | 0.122876781 |
| RhoL     | -0.472579311 | 0.001747 | 0.132959684 |
| CG34376  | 0.497281292  | 0.001753 | 0.132959684 |
| bur      | 0.471887383  | 0.001822 | 0.136797232 |
| CG31098  | 0.472187578  | 0.002067 | 0.15364011  |

This table includes the transcription factor importance values as well as importance values relative to the 20<sup>th</sup> most important variable from the model fitting procedure for the top most important variables.
